# Supplementary material
Source: PubMed Central journal article supplement (PMC3827971)

## Enantioselective Syntheses of FR901464 and Spliceostatin A: Potent Inhibitors of Spliceosome

Arun K. Ghosh\* and Zhi-Hua Chen

Department of Chemistry and Department of Medicinal Chemistry, Purdue University,  
560 Oval Drive, West Lafayette, Indiana 47907, United States

E-mail: [akghosh@purdue.edu](mailto:akghosh@purdue.edu)

### Table of contents:

|                                                                                       |                |
|---------------------------------------------------------------------------------------|----------------|
| <i>General information</i> -----                                                      | <i>S1</i>      |
| <i>Experimental details for new compounds</i> -----                                   | <i>S2-S13</i>  |
| <i>Copies of <sup>1</sup>H and <sup>13</sup>C spectra of new compounds</i> -----      | <i>S14-S28</i> |
| <i>Copies of <sup>1</sup>H and <sup>13</sup>C spectra of authentic FR901464</i> ----- | <i>S29-S30</i> |

**General Information:** Those reactions which required anhydrous conditions were carried out under an argon atmosphere using oven-dried glassware (120 °C). All chemicals and reagents were purchased from commercial suppliers and used without further purification. Anhydrous solvents were obtained as follows: anhydrous tetrahydrofuran and diethyl ether were distilled from sodium metal under argon, anhydrous dichloromethane was dried via distillation from CaH<sub>2</sub> immediately prior to use under argon, and anhydrous methanol and ethanol were distilled from activated magnesium under argon. All other solvents were reagent grade. TLC analysis was conducted using glass-backed Thin-Layer Silica Gel Chromatography Plates (60 Å, 250 µm thickness, F-254 indicator). Flash chromatography was performed using 230-400 mesh, 60 Å pore diameter silica gel. <sup>1</sup>H NMR spectra were recorded at 400 or 500 MHz. <sup>13</sup>C NMR spectra were recorded at 100 or 150 MHz. Chemical shifts are reported in parts per million and are referenced to the deuterated residual solvent peak. NMR data is reported as: δ value (chemical shift, *J*-value (Hz), integration, where s = singlet, d = doublet, t = triplet, q = quartet, brs = broad singlet). IR spectra were recorded on a Varian 2000 Infrared spectrophotometer and are reported as cm<sup>-1</sup>. LRMS and HRMS spectra were recorded at the Purdue University Department of Chemistry Mass Spectrometry Center. Melting point was measured on a melting point apparatus and was

uncorrected.

*Synthesis of compound S1:*

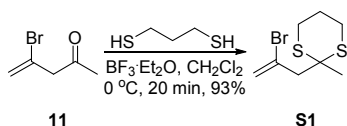

To a solution of **11** (3.43 g, 21.07 mmol) and 1,3-propanedithiol (2.54 mL, 25.28 mmol) in anhydrous dichloromethane (55 mL) at 0 °C under argon was added BF<sub>3</sub>·Et<sub>2</sub>O (2.60 mL, 21.07 mmol) dropwise over 5 min. The reaction mixture was stirred for an additional 15 min and then quenched with 5% NaOH (120 mL). The aqueous phase was extracted with CH<sub>2</sub>Cl<sub>2</sub> (3 × 30 mL). The combined organic extracts were dried over MgSO<sub>4</sub>, filtered, and concentrated. The residue was purified via silica gel chromatography (30:1 to 15:1 hexane/ethyl acetate) to afford **S1** (4.939 g, 93%) as a light yellow oil: <sup>1</sup>H NMR (400 MHz, CDCl<sub>3</sub>) δ 5.72 (s, 1H), 5.68 (d, *J* = 1.2 Hz, 1H), 3.12 (s, 2H), 2.97-2.75 (m, 4H), 2.08-1.85 (m, 2H), 1.71 (s, 3H); <sup>13</sup>C NMR (100 MHz, CDCl<sub>3</sub>) δ 126.5, 122.5, 51.3, 47.8, 27.7, 26.8, 24.7; IR (neat) 1622, 1423, 1372, 1276, 1139, 1071, 906, 816 cm<sup>-1</sup>; LRMS (ESI), *m/z* 275.0 (M+Na)<sup>+</sup>.

*Synthesis of compounds 12 and 13:*

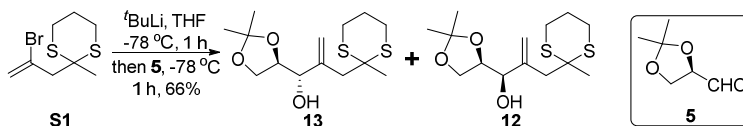

To a solution of **S1** (2.27 g, 9.02 mmol) in anhydrous THF (45 mL) at -78 °C under argon was added *tert*-butyllithium (1.7 M, 13.3 mL, 22.6 mmol). After stirring at -78 °C for 1 h, a solution of aldehyde **5** (1.75 g, 13.5 mmol) in THF (15 mL) was added. The resulting mixture was stirred for 1 h and then quenched with water (20 mL). After warming to room temperature, the reaction mixture was diluted with CH<sub>2</sub>Cl<sub>2</sub> (60 mL). The aqueous phase was extracted with CH<sub>2</sub>Cl<sub>2</sub> (3 × 20 mL). The combined organic extracts were dried over MgSO<sub>4</sub>, filtered, and concentrated. The residue was purified via silica gel chromatography (20:1 to 15:1 hexane/ethyl acetate) to afford **13** (932 mg, 34%) and **12** (877 mg, 32%) as a colorless oil. Compound **13**: [ $\alpha$ ]<sub>D</sub><sup>20</sup> -5.6 (c 1.07, CH<sub>2</sub>Cl<sub>2</sub>); <sup>1</sup>H NMR (400 MHz, CDCl<sub>3</sub>) δ 5.43 (s, 1H), 5.16 (s, 1H), 4.41 (d, *J* = 5.2 Hz, 1H), 4.20 (q, *J* = 6.0 Hz, 1H), 4.00-3.90 (m, 2H), 2.97-2.69 (m, 6H), 2.52 (brs, 1H), 2.05-1.78 (m, 2H),

1.63 (s, 3H), 1.44 (s, 3H), 1.35 (s, 3H);  $^{13}\text{C}$  NMR (100 MHz,  $\text{CDCl}_3$ )  $\delta$  143.6, 117.8, 109.4, 77.7, 73.3, 65.3, 48.3, 45.1, 28.0, 26.9, 26.8, 26.6, 25.1, 24.9; IR (neat) 3460, 2907, 1643, 1424, 1372, 1213, 1157, 1066, 909  $\text{cm}^{-1}$ ; HRMS (ESI),  $m/z$  ( $\text{M}+\text{Na}$ ) $^+$  Calcd for  $\text{C}_{14}\text{H}_{24}\text{O}_3\text{S}_2\text{Na}$ : 327.1065, found 327.1067. Compound **12**:  $[\alpha]_{\text{D}}^{20} +8.8$  ( $c$  1.03,  $\text{CH}_2\text{Cl}_2$ );  $^1\text{H}$  NMR (400 MHz,  $\text{CDCl}_3$ )  $\delta$  5.36 (s, 1H), 5.21 (s, 1H), 4.30-4.23 (m, 2H), 4.01 (t,  $J = 8.0$  Hz, 1H), 3.80 (t,  $J = 7.2$  Hz, 1H), 3.02-2.78 (m, 5H), 2.75-2.62 (m, 2H), 2.08-1.89 (m, 2H), 1.65 (s, 3H), 1.45 (s, 3H), 1.39 (s, 3H);  $^{13}\text{C}$  NMR (100 MHz,  $\text{CDCl}_3$ )  $\delta$  143.9, 118.5, 109.7, 77.8, 74.5, 66.3, 48.3, 44.8, 27.9, 26.8, 26.6, 25.3, 24.9; IR (neat) 3467, 2922, 1643, 1455, 1372, 1212, 1157, 1067, 909  $\text{cm}^{-1}$ ; HRMS (ESI),  $m/z$  ( $\text{M}+\text{Na}$ ) $^+$  Calcd for  $\text{C}_{14}\text{H}_{24}\text{O}_3\text{S}_2\text{Na}$ : 327.1065, found 327.1068.

*Conversion of compound 12 into 13:*

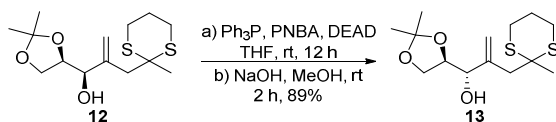

To a solution of **12** (230 mg, 0.76 mmol) in anhydrous THF (4 mL) at room temperature under argon was added triphenylphosphine (397 mg, 1.5 mmol) and *p*-nitrobenzoic acid (253 mg, 1.52 mmol), which was stirred for a period of 10 min. DEAD (239  $\mu\text{L}$ , 1.5 mmol) was then added dropwise. After stirring at room temperature for an additional 12 h, the reaction mixture was diluted with  $\text{CH}_2\text{Cl}_2$  (10 mL) and quenched with 10%  $\text{NaHCO}_3$  (10 mL). The aqueous phase was extracted with  $\text{CH}_2\text{Cl}_2$  ( $3 \times 10$  mL). The combined organic extracts were dried over  $\text{MgSO}_4$ , filtered, and concentrated to give crude product as a yellow oil.

The aforementioned crude product was dissolved in anhydrous MeOH (5 mL) at room temperature under argon and NaOH (91 mg, 2.3 mmol) was then added. After stirring at room temperature for 2 h, the reaction mixture was concentrated to give a yellow oil which was then purified via silica gel chromatography (10:1 to 5:1 hexane/ethyl acetate) to afford **13** (205 mg, 89%) as a colorless oil.

*Synthesis of compound 14:*

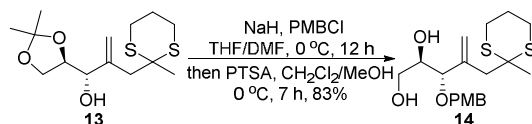

To a solution of **13** (893 mg, 2.9 mmol) in anhydrous THF (8 mL) and DMF (4 mL) at 0 °C under argon was added NaH (60%, 353 mg, 8.8 mmol). After stirring at 0 °C for 1 h, PMBCl (797  $\mu$ L, 5.88 mmol) was added dropwise. The resulting mixture was stirred for 11 h at this temperature and then concentrated. The residue was then dissolved in anhydrous CH<sub>2</sub>Cl<sub>2</sub> (15 mL) and MeOH (10 mL) at 0 °C, to which PTSA (1.677 g, 8.8 mmol) was added. After stirring at 0 °C for 7 h, the reaction mixture was concentrated to give a yellow oil which was purified via silica gel chromatography (4:1 to 1:2 hexane/ethyl acetate) to afford **14** (936 mg, 83%) as a light yellow oil:  $[\alpha]_D^{20} +32.1$  (*c* 1.07, CH<sub>2</sub>Cl<sub>2</sub>); <sup>1</sup>H NMR (400 MHz, CDCl<sub>3</sub>)  $\delta$  7.25 (d, *J* = 8.0 Hz, 2H), 6.87 (d, *J* = 8.4 Hz, 2H), 5.50 (s, 1H), 5.41 (s, 1H), 4.62 (d, *J* = 11.2 Hz, 1H), 4.37-4.25 (m, 2H), 3.80 (s, 3H), 3.82-3.67 (m, 2H), 3.64 (d, *J* = 7.6 Hz, 1H), 3.00-2.75 (m, 5H), 2.64 (d, *J* = 14.8 Hz, 1H), 2.29 (brs, 1H), 2.05-1.89 (m, 2H), 1.72 (s, 3H), 1.62 (brs, 1H); <sup>13</sup>C NMR (100 MHz, CDCl<sub>3</sub>)  $\delta$  152.3, 140.9, 130.1, 129.4, 118.5, 113.8, 84.3, 71.4, 71.3, 62.7, 55.2, 48.4, 43.5, 28.4, 26.9, 26.8, 24.9; IR (neat) 3418, 2909, 1613, 1514, 1423, 1248, 1034, 909 cm<sup>-1</sup>; HRMS (ESI), *m/z* (M+Na)<sup>+</sup> Calcd for C<sub>19</sub>H<sub>28</sub>O<sub>4</sub>S<sub>2</sub>Na: 407.1327, found 407.1322.

*Synthesis of compound S2:*

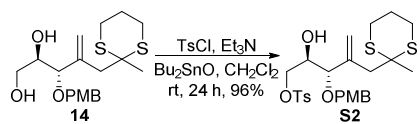

To a solution of **14** (2.43 g, 6.3 mmol) in anhydrous dichloromethane (50 mL) at room temperature under argon was added Et<sub>3</sub>N (1.33 mL, 9.54 mmol), Bu<sub>3</sub>SnO (95 mg, 0.4 mmol), and TsCl (1.443 g, 7.6 mmol) subsequently. The reaction mixture was stirred for 24 h and then concentrated. The residue was purified via silica gel chromatography (4:1 to 3:1 hexane/ethyl acetate) to afford **S2** (3.27 g, 96%) as a light yellow oil:  $[\alpha]_D^{20} +22$  (*c* 1.1, CH<sub>2</sub>Cl<sub>2</sub>); <sup>1</sup>H NMR (400 MHz, CDCl<sub>3</sub>)  $\delta$  7.78 (d, *J* = 8.0 Hz, 2H), 7.32 (d, *J* = 8.0 Hz, 2H), 7.19 (d, *J* = 8.4 Hz, 2H), 6.85 (d, *J* = 8.4 Hz, 2H), 5.43 (s, 1H), 5.40 (s, 1H), 4.53 (d, *J* = 11.2 Hz, 1H), 4.30-4.19 (m, 2H), 4.19-4.05 (m, 2H), 3.87 (s, 1H), 3.80 (s, 3H), 2.95-2.75 (m, 5H), 2.62 (d, *J* = 15.2 Hz, 1H), 2.44 (s, 3H), 2.05-1.86 (m, 2H), 1.68 (s, 3H), 1.66 (brs, 1H); <sup>13</sup>C NMR (100 MHz, CDCl<sub>3</sub>)  $\delta$  159.1, 144.7, 140.7, 132.7, 129.9, 129.7, 129.3, 127.8, 119.2, 113.6, 81.4, 71.2, 70.8, 55.1, 48.2, 43.3, 28.1, 26.7, 24.8, 21.5; IR (neat) 3516, 2908, 1613, 1514, 1360, 1249, 1176, 1096, 984 cm<sup>-1</sup>; LRMS (ESI), *m/z*

561.1 (M+Na)<sup>+</sup>.

*Synthesis of compound 15:*

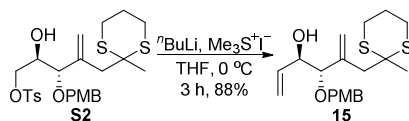

To a suspension of trimethylsulfonium iodide (5.18 g, 25.4 mmol) in anhydrous THF (50 mL) at 0 °C under argon was added <sup>n</sup>BuLi (1.6 M, 13.2 mL, 21.2 mmol) dropwise. After stirring at 0 °C for 1 h, a solution of **S2** (2.276 g, 4.2 mmol) in THF (20 mL) was added. The resulting mixture was stirred for an additional 2 h and then quenched with water (10 mL). After warming up to room temperature, the reaction mixture was diluted with CH<sub>2</sub>Cl<sub>2</sub> (60 mL). The aqueous phase was extracted with CH<sub>2</sub>Cl<sub>2</sub> (3 × 20 mL). The combined organic extracts were dried over MgSO<sub>4</sub>, filtered, and concentrated. The residue was purified via silica gel chromatography (5:1 to 3:1 hexane/ethyl acetate) to afford **15** (1.415 g, 88%) as a colorless oil: [α]<sub>D</sub><sup>20</sup> +42.4 (c 1.09, CH<sub>2</sub>Cl<sub>2</sub>); <sup>1</sup>H NMR (400 MHz, CDCl<sub>3</sub>) δ 7.27 (d, *J* = 8.0 Hz, 2H), 6.87 (d, *J* = 8.4 Hz, 2H), 5.92 (ddd, *J* = 16.8, 10.8, 5.2 Hz, 1H), 5.44 (s, 1H), 5.37 (s, 1H), 5.28 (d, *J* = 17.2 Hz, 1H), 5.18 (d, *J* = 10.4 Hz, 1H), 4.64 (d, *J* = 11.2 Hz, 1H), 4.34 (d, *J* = 11.6 Hz, 1H), 4.22 (s, 2H), 3.80 (s, 3H), 3.00-2.72 (m, 5H), 2.63 (d, *J* = 14.8 Hz, 1H), 2.32 (d, *J* = 4.8 Hz, 1H), 2.05-1.90 (m, 2H), 1.71 (s, 3H); <sup>13</sup>C NMR (100 MHz, CDCl<sub>3</sub>) δ 159.1, 140.4, 136.5, 130.4, 129.3, 118.6, 116.2, 113.7, 84.2, 73.3, 70.8, 55.2, 48.5, 43.9, 28.2, 26.8, 24.9; IR (neat) 3468, 2907, 1613, 1514, 1423, 1248, 1034, 920 cm<sup>-1</sup>; HRMS (ESI), *m/z* (M+Na)<sup>+</sup> Calcd for C<sub>20</sub>H<sub>28</sub>O<sub>3</sub>S<sub>2</sub>Na: 403.1378, found 403.1381.

*Synthesis of compound 16:*

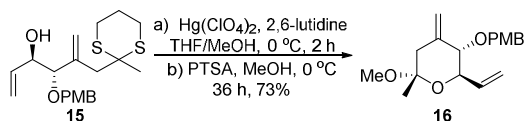

To a solution of **15** (460 mg, 1.2 mmol) in anhydrous THF (4 mL) and MeOH (4 mL) at 0 °C under argon was added 2,6-lutidine (564 μL, 4.8 mmol) and Hg(ClO<sub>4</sub>)<sub>2</sub> (969 mg, 2.4 mmol). After stirring at 0 °C for 2 h, the mixture was quenched with saturated Na<sub>2</sub>S<sub>2</sub>O<sub>3</sub> (10 mL). After warming to room temperature, the reaction mixture was diluted with CH<sub>2</sub>Cl<sub>2</sub> (20 mL). The organic phase

was washed with 10% CuSO<sub>4</sub> (20 mL) and the combined aqueous phases were extracted with CH<sub>2</sub>Cl<sub>2</sub> (3 × 10 mL). The combined organic extracts were dried over MgSO<sub>4</sub>, filtered, and concentrated. The residue was then dissolved in anhydrous MeOH (4 mL) at 0 °C under argon and PTSA (12 mg, 0.06 mmol) was added. The resulting mixture was stirred at 0 °C for 36 h and then concentrated. The residue was purified via silica gel chromatography (15:1 to 10:1 hexane/ethyl acetate) to afford **16** (269 mg, 73%) as a light yellow oil: [ $\alpha$ ]<sub>D</sub><sup>20</sup> +163.0 (*c* 1.07, CH<sub>2</sub>Cl<sub>2</sub>); <sup>1</sup>H NMR (400 MHz, CDCl<sub>3</sub>)  $\delta$  7.27 (d, *J* = 8.4 Hz, 2H), 6.87 (d, *J* = 8.8 Hz, 2H), 5.94 (ddd, *J* = 17.2, 10.4, 6.8 Hz, 1H), 5.41 (d, *J* = 17.2 Hz, 1H), 5.25 (d, *J* = 10.4 Hz, 1H), 5.19 (s, 1H), 4.92 (s, 1H), 4.61 (d, *J* = 11.2 Hz, 1H), 4.48 (d, *J* = 10.8 Hz, 1H), 3.90 (t, *J* = 8.0 Hz, 1H), 3.80 (s, 3H), 3.60 (d, *J* = 9.2 Hz, 1H), 3.19 (s, 3H), 2.55 (d, *J* = 9.6 Hz, 1H), 2.36 (d, *J* = 14.0 Hz, 1H), 1.36 (s, 3H); <sup>13</sup>C NMR (100 MHz, CDCl<sub>3</sub>)  $\delta$  159.3, 141.4, 136.2, 130.2, 129.5, 117.5, 113.7, 108.6, 99.0, 79.7, 75.1, 72.7, 55.3, 48.2, 45.0, 22.8; IR (neat) 1698, 1600, 1513, 1463, 1260, 1160, 1033, 833 cm<sup>-1</sup>; HRMS (ESI), *m/z* (M+Na)<sup>+</sup> Calcd for C<sub>18</sub>H<sub>24</sub>O<sub>4</sub>Na: 327.1572, found 327.1576.

*Synthesis of compound S3:*

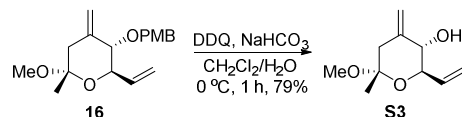

To a solution of **16** (113 mg, 0.4 mmol) in dichloromethane (3 mL) at 0 °C was added NaHCO<sub>3</sub> (64 mg, 0.8 mmol), water (30  $\mu$ L), and DDQ (85 mg, 0.4 mmol). After stirring at 0 °C for 30 min, NaHCO<sub>3</sub> (64 mg, 0.8 mmol), water (30  $\mu$ L), and DDQ (85 mg, 0.8 mmol) were added again. After an additional 30 min, the mixture was quenched with saturated NaHCO<sub>3</sub> (5 mL). The aqueous phase was extracted with CH<sub>2</sub>Cl<sub>2</sub> (3 × 10 mL). The combined organic extracts were dried over MgSO<sub>4</sub>, filtered, and concentrated. The residue was then purified via silica gel chromatography (8:1 to 5:1 hexane/ethyl acetate) to afford **S3** (54 mg, 79%) as a colorless oil: [ $\alpha$ ]<sub>D</sub><sup>20</sup> +190.6 (*c* 1.02, CH<sub>2</sub>Cl<sub>2</sub>); <sup>1</sup>H NMR (400 MHz, CDCl<sub>3</sub>)  $\delta$  5.96 (ddd, *J* = 17.6, 10.4, 7.2 Hz, 1H), 5.43 (d, *J* = 17.2 Hz, 1H), 5.35 (d, *J* = 10.4 Hz, 1H), 5.16 (s, 1H), 4.93 (s, 1H), 3.88-3.70 (m, 2H), 3.21 (s, 3H), 2.56 (d, *J* = 14.0 Hz, 1H), 2.41 (d, *J* = 13.6 Hz, 1H), 1.75 (d, *J* = 4.8 Hz, 1H), 1.38 (s, 3H); <sup>13</sup>C NMR (100 MHz, CDCl<sub>3</sub>)  $\delta$  142.9, 136.0, 119.3, 107.7, 99.0, 77.1, 71.7, 48.3, 44.8, 22.8; IR (neat) 3435, 2992, 1379, 1230, 1184, 1060, 890, 668 cm<sup>-1</sup>; LRMS (ESI), *m/z* 207.1

(M+Na)<sup>+</sup>.

Synthesis of compound **3**:

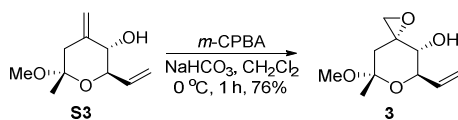

To a solution of **S3** (55 mg, 0.3 mmol) in anhydrous dichloromethane (3 mL) at 0 °C under argon was added NaHCO<sub>3</sub> (101 mg, 1.2 mmol) and *m*-CPBA (62 mg, 0.36 mmol). After stirring at 0 °C for 30 min, *m*-CPBA (62 mg, 0.4 mmol) was again added. After an additional 30 min, the mixture was quenched with 5% NaOH (5 mL). The aqueous phase was extracted with CH<sub>2</sub>Cl<sub>2</sub> (5 × 5 mL). The combined organic extracts were dried over MgSO<sub>4</sub>, filtered, and concentrated. The residue was then purified via silica gel chromatography (2:1 to 1:1 hexane/ethyl acetate) to afford **3** (46 mg, 76%) as a white powder: mp 53-57 °C; [ $\alpha$ ]<sub>D</sub><sup>20</sup> +187.2 (*c* 1.05, CH<sub>2</sub>Cl<sub>2</sub>); <sup>1</sup>H NMR (400 MHz, CDCl<sub>3</sub>)  $\delta$  6.00 (ddd, *J* = 17.2, 10.4, 6.4 Hz, 1H), 5.43 (d, *J* = 17.2 Hz, 1H), 5.29 (d, *J* = 10.4 Hz, 1H), 3.98 (dd, *J* = 9.6, 6.4 Hz, 1H), 3.57 (t, *J* = 10.4 Hz, 1H), 3.26 (s, 3H), 2.99 (d, *J* = 4.4 Hz, 1H), 2.49 (d, *J* = 4.4 Hz, 1H), 2.29 (d, *J* = 14.8 Hz, 1H), 1.75 (d, *J* = 3.2 Hz, 1H), 1.72 (d, *J* = 6.4 Hz, 1H), 1.38 (s, 3H); <sup>13</sup>C NMR (100 MHz, CDCl<sub>3</sub>)  $\delta$  135.6, 117.8, 98.5, 73.1, 67.3, 56.4, 48.3, 47.1, 41.9, 23.0; IR (KBr) 3418, 2910, 1646, 1378, 1236, 1160, 1012, 919cm<sup>-1</sup>; HRMS (ESI), *m/z* (M+Na)<sup>+</sup> Calcd for C<sub>10</sub>H<sub>16</sub>O<sub>4</sub>Na: 223.0946, found 223.0948.

Synthesis of compound **S4**:

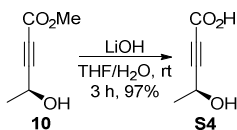

To a solution of **10** (539 mg, 4.2 mmol) in THF (5 mL) and water (1 mL) at room temperature was added LiOH (303 mg, 12.6 mmol). After stirring for 3 h, hydrochloric acid (37%, 1.2 mL) was added at 0 °C to adjust the pH to a range of ~1-2. The resulting mixture was concentrated and the residue was purified via silica gel chromatography (10:1 to 5:1 dichloromethane/methanol) to afford **S4** (466 mg, 97%) as a colorless oil: [ $\alpha$ ]<sub>D</sub><sup>20</sup> -48.5 (*c* 1.08, ethyl acetate); <sup>1</sup>H NMR (400 MHz, CD<sub>3</sub>OH)  $\delta$  5.06 (brs, 2H), 4.58 (q, *J* = 6.8 Hz, 1H), 1.44 (d, *J* = 6.4 Hz, 3H); <sup>13</sup>C NMR (100 MHz, CD<sub>3</sub>OH)  $\delta$  156.2, 90.0, 76.4, 58.2, 23.7; IR (KBr) 3379, 2990,

2237, 1699, 1376, 1269, 1057  $\text{cm}^{-1}$ ; LRMS (ESI),  $m/z$  137.0 ( $\text{M}+\text{Na}$ )<sup>+</sup>.

*Synthesis of compound 17:*

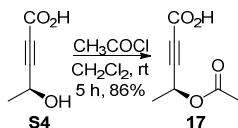

To a solution of **S4** (477 mg, 4.2 mmol) in anhydrous dichloromethane (10 mL) at room temperature under argon was added an excess of acetylchloride (5 mL). After stirring for 5 h, the resulting mixture was concentrated and the residue was purified via silica gel chromatography (1:1 to 1:2 hexane/ethyl acetate) to afford **17** (561 mg, 86%) as a colorless oil:  $[\alpha]_{\text{D}}^{20}$  -114.4 ( $c$  1.06, ethyl acetate); <sup>1</sup>H NMR (400 MHz,  $\text{CDCl}_3$ )  $\delta$  9.64 (brs, 1H), 5.51 (q,  $J$  = 6.8 Hz, 1H), 2.09 (s, 3H), 1.54 (d,  $J$  = 6.8 Hz, 3H); <sup>13</sup>C NMR (100 MHz,  $\text{CDCl}_3$ )  $\delta$  170.1, 156.4, 86.9, 75.7, 59.5, 20.8, 20.1; IR (neat) 3501, 2996, 2249, 1732, 1374, 1233, 1050  $\text{cm}^{-1}$ ; LRMS (ESI),  $m/z$  179.0 ( $\text{M}+\text{Na}$ )<sup>+</sup>.

*Synthesis of compound 7:*

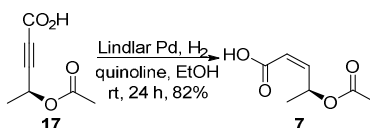

To a solution of **17** (500 mg, 3.2 mmol) in anhydrous ethanol (10 mL) was added Lindlar catalyst (58 mg) and quinoline (38  $\mu\text{L}$ , 0.3 mmol). The mixture was exposed to an atmosphere of  $\text{H}_2$  at room temperature. After 24 h, the resulting mixture was filtered and concentrated. The residue was purified via silica gel chromatography (10:1 to 8:1 hexane/ethyl acetate) to afford **7** (415 mg, 82%) as a colorless oil:  $[\alpha]_{\text{D}}^{20}$  +20.6 ( $c$  1.18,  $\text{CH}_2\text{Cl}_2$ ); <sup>1</sup>H NMR (400 MHz,  $\text{CDCl}_3$ )  $\delta$  6.30-6.19 (m, 2H), 5.86-5.78 (m, 1H), 2.05 (s, 3H), 1.38 (d,  $J$  = 5.6 Hz, 3H); <sup>13</sup>C NMR (100 MHz,  $\text{CDCl}_3$ )  $\delta$  170.5, 170.2, 150.4, 119.3, 68.7, 21.1, 19.5; IR (neat) 2986, 1732, 1652, 1434, 1372, 1244, 1121, 1049, 826  $\text{cm}^{-1}$ ; LRMS (ESI),  $m/z$  181.0 ( $\text{M}+\text{Na}$ )<sup>+</sup>.

*Synthesis of compound 9:*

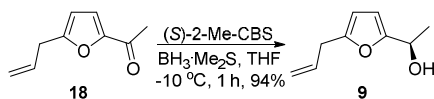

To a solution of (*S*)-2-Me-CBS catalyst (4.357 g, 15.7 mmol) in anhydrous THF (80 mL) at 0



°C under argon was added  $\text{BH}_3\cdot\text{Me}_2\text{S}$  (3.3 mL, 34.6 mmol). After stirring for 30 min, the mixture was cooled to  $-10\text{ }^\circ\text{C}$  and a solution of **18** (4.716 g, 31.4 mmol) in THF (20 mL) was added. The resulting mixture was stirred for 30 min and then quenched with MeOH (10 mL) and water (20 mL). After warming to room temperature, the reaction mixture was diluted with  $\text{CH}_2\text{Cl}_2$  (100 mL). The aqueous phase was extracted with  $\text{CH}_2\text{Cl}_2$  ( $3 \times 30$  mL). The combined organic extracts were dried over  $\text{MgSO}_4$ , filtered, and concentrated. The residue was purified via silica gel chromatography (10:1 to 6:1 hexane/ethyl acetate) to afford **9** (4.492 g, 94% yield, 93% *ee*) as a colorless oil:  $[\alpha]_{\text{D}}^{20} +20.6$  (*c* 1.10, ethyl acetate);  $^1\text{H}$  NMR (400 MHz,  $\text{CDCl}_3$ )  $\delta$  6.12 (d,  $J = 2.8$  Hz, 1H), 6.00-5.86 (m, 2H), 5.21-5.05 (m, 2H), 4.83 (q,  $J = 6.0$  Hz, 1H), 3.37 (d,  $J = 6.4$  Hz, 2H), 2.02 (s, 1H), 1.51 (d,  $J = 6.4$  Hz, 3H);  $^{13}\text{C}$  NMR (100 MHz,  $\text{CDCl}_3$ )  $\delta$  156.3, 153.4, 133.8, 116.9, 106.0, 105.8, 63.6, 32.6, 21.1; IR (neat) 3366, 2361, 1643, 1558, 1371, 1181, 1077, 919  $\text{cm}^{-1}$ ; HRMS (ESI),  $m/z$  ( $\text{M}+\text{Na}$ ) $^+$  Calcd for  $\text{C}_9\text{H}_{12}\text{O}_2\text{Na}$ : 175.0735, found 175.0736.

*Synthesis of compound 19:*

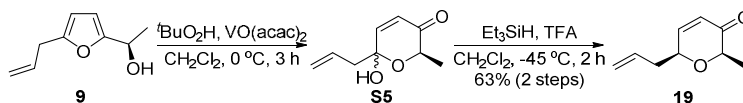

To a solution of **9** (2.37 g, 15.6 mmol) in dichloromethane (60 mL) at  $0\text{ }^\circ\text{C}$  was added  $\text{VO}(\text{acac})_2$  (414 mg, 1.6 mmol) and  $t\text{-BuOOH}$  (5.5 M, 3.7 mL, 20.4 mmol). After stirring for 3 h, the mixture was treated with water (20 mL). The aqueous phase was extracted with  $\text{CH}_2\text{Cl}_2$  ( $3 \times 20$  mL). The combined organic extracts were dried over  $\text{MgSO}_4$ , filtered, and concentrated to give **S5** as a yellow oil.

The aforementioned crude product **S5** was dissolved in anhydrous dichloromethane (60 mL) at  $-45\text{ }^\circ\text{C}$  under argon.  $\text{Et}_3\text{SiH}$  (12.47 mL, 78.1 mmol) and TFA (17.40 mL, 234.2 mmol) were then added subsequently. After stirring at  $-45\text{ }^\circ\text{C}$  for 2 h, the mixture was treated with 30%  $\text{NaHCO}_3$  to adjust the pH to a range of  $\sim 8$ -9. The aqueous phase was extracted with  $\text{CH}_2\text{Cl}_2$  ( $3 \times 20$  mL). The combined organic extracts were dried over  $\text{MgSO}_4$ , filtered, and concentrated. The residue was purified via silica gel chromatography (40:1 to 20:1 hexane/ethyl acetate) to afford **19** (1.497 g, 63%, 2 steps) as a light yellow oil:  $[\alpha]_{\text{D}}^{20} +34.4$  (*c* 1.03, ethyl acetate);  $^1\text{H}$  NMR (400 MHz,  $\text{CDCl}_3$ )  $\delta$  6.94 (d,  $J = 10.0$  Hz, 1H), 6.09 (dd,  $J = 10.0, 2.4$  Hz, 1H), 5.92-5.77 (m, 1H), 5.25-5.09 (m, 2H), 4.40 (t,  $J = 5.6$  Hz, 1H), 4.07 (dt,  $J = 6.4, 5.2$  Hz, 1H), 2.55-2.33 (m, 2H), 1.38

(d,  $J = 6.4$  Hz, 3H);  $^{13}\text{C}$  NMR (100 MHz,  $\text{CDCl}_3$ )  $\delta$  197.0, 150.6, 133.0, 126.7, 118.4, 77.0, 73.5, 39.0, 15.4; IR (neat) 1732, 1694, 1446, 1374, 1237, 1097, 924, 741  $\text{cm}^{-1}$ ; HRMS (ESI),  $m/z$  ( $\text{M}+\text{Na}$ ) $^+$  Calcd for  $\text{C}_9\text{H}_{12}\text{O}_2\text{Na}$ : 175.0735, found 175.0737.

*Synthesis of compound 8:*

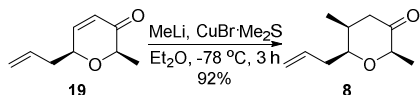

To a suspension of  $\text{CuBr}\cdot\text{Me}_2\text{S}$  (1.3 g, 6.3 mmol) in anhydrous  $\text{Et}_2\text{O}$  (10 mL) at  $-78$   $^\circ\text{C}$  under argon was added  $\text{MeLi}$  (3 M, 3.9 mL, 11.70 mmol). After stirring for 1 h, a solution of **19** (594 mg, 3.90 mmol) in  $\text{Et}_2\text{O}$  (5 mL) was added. The resulting mixture was stirred for an additional 2 h and then quenched with water (5 mL). After warming to room temperature, the reaction mixture was diluted with  $\text{CH}_2\text{Cl}_2$  (10 mL). The aqueous phase was extracted with  $\text{CH}_2\text{Cl}_2$  ( $3 \times 5$  mL). The combined organic extracts were dried over  $\text{MgSO}_4$ , filtered, and concentrated. The residue was purified via silica gel chromatography (50:1 to 30:1 hexane/ethyl acetate) to afford **8** (604 mg, 92%) as a colorless oil:  $[\alpha]_{\text{D}}^{20}$   $-75.1$  ( $c$  1.01, ethyl acetate);  $^1\text{H}$  NMR (400 MHz,  $\text{CDCl}_3$ )  $\delta$  5.87-5.73 (m, 1H), 5.15-4.99 (m, 2H), 3.95-3.83 (m, 2H), 2.61 (dd,  $J = 11.2, 6.0$  Hz, 1H), 2.43-2.23 (m, 3H), 2.15 (dt,  $J = 14.4, 7.2$  Hz, 1H), 1.23 (d,  $J = 6.8$  Hz, 3H), 0.93 (d,  $J = 6.8$  Hz, 3H);  $^{13}\text{C}$  NMR (100 MHz,  $\text{CDCl}_3$ )  $\delta$  208.6, 134.5, 117.0, 79.3, 78.5, 46.6, 36.8, 34.8, 14.9, 12.9; IR (neat) 1732, 1715, 1417, 1379, 1244, 1078, 984, 921  $\text{cm}^{-1}$ ; HRMS (ESI),  $m/z$  ( $\text{M}+\text{Na}$ ) $^+$  Calcd for  $\text{C}_{10}\text{H}_{16}\text{O}_2\text{Na}$ : 191.1048, found 191.1050.

*Synthesis of compound 22:*

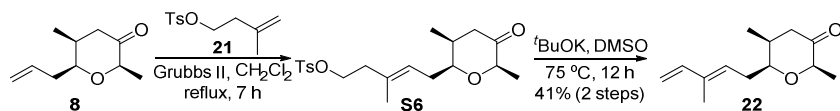

A solution of **8** (240 mg, 1.43 mmol) was prepared in anhydrous dichloromethane (4 mL) at room temperature under argon. To a stirred solution of **21** (3.428 g, 14.3 mmol) in anhydrous dichloromethane (10 mL) was added an aliquot of solution **8** (1 mL) followed by Grubbs' 2nd generation catalyst (121 mg, 0.14 mmol) under argon. The resulting mixture was heated up at reflux for 1.5 h, after which an additional aliquot of solution **8** (1 mL) was added. This

additional process was repeated after 3 h and 5 h. Following 7 h of reaction time, the mixture was concentrated under reduced pressure. The residue was purified via silica gel chromatography (10:1 to 5:1 hexane/ethyl acetate) to afford crude **S6** as a yellow oil.

The aforementioned crude **S6** was then dissolved in DMSO (4 mL) followed by addition of <sup>t</sup>BuOK (320 mg, 2.9 mmol). The resulting mixture was heated to 75 °C for 12 h, cooled to room temperature, and diluted with CH<sub>2</sub>Cl<sub>2</sub> (10 mL) and water (5 mL). The aqueous phase was extracted with CH<sub>2</sub>Cl<sub>2</sub> (3 × 10 mL). The combined organic extracts were dried over MgSO<sub>4</sub>, filtered, and concentrated. The residue was purified via silica gel chromatography (50:1 to 40:1 hexane/acetone) to afford **22** (122 mg, 41%, 2 steps) as a colorless oil: [α]<sub>D</sub><sup>20</sup> -33.4 (*c* 1.07, CH<sub>2</sub>Cl<sub>2</sub>); <sup>1</sup>H NMR (400 MHz, CDCl<sub>3</sub>) δ 6.39 (dd, *J* = 17.2, 10.4 Hz, 1H), 5.50 (t, *J* = 7.2 Hz, 1H), 5.13 (d, *J* = 14.8 Hz, 1H), 4.98 (d, *J* = 10.8 Hz, 1H), 4.00-3.85 (m, 2H), 2.64 (dd, *J* = 15.2, 6.0 Hz, 1H), 2.53-2.41 (m, 1H), 2.38-2.25 (m, 3H), 1.78 (s, 3H), 1.28 (d, *J* = 6.4 Hz, 3H), 0.98 (d, *J* = 7.2 Hz, 3H); <sup>13</sup>C NMR (100 MHz, CDCl<sub>3</sub>) δ 208.7, 141.2, 135.9, 127.9, 111.4, 79.5, 78.8, 46.7, 34.9, 31.4, 15.0, 13.1, 11.9; IR (neat) 1724, 1643, 1607, 1444, 1385, 1260, 1228, 1111, 894 cm<sup>-1</sup>; HRMS (ESI), *m/z* (M+Na)<sup>+</sup> Calcd for C<sub>13</sub>H<sub>20</sub>O<sub>2</sub>Na: 231.1361, found 231.1355.

#### Synthesis of compound 4:

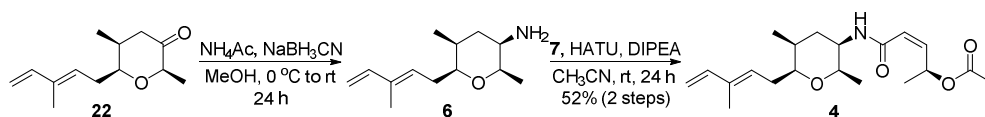

To a solution of **22** (65 mg, 0.3 mmol) in anhydrous methanol (3 mL) at 0 °C under argon was added ammonium acetate (482 mg, 6.2 mmol) and NaBH<sub>3</sub>CN (99 mg, 1.6 mmol). The reaction mixture was then gradually warmed to room temperature. After stirring for 24 h, the reaction mixture was added to aqueous NaOH (4 M, 1.2 mL) to adjust the pH to a range of ~8-9 and then diluted with ethyl acetate (10 mL). The resulting mixture was directly dried over MgSO<sub>4</sub>, filtered, and concentrated to give crude **6** as a light yellow oil.

To a stirred solution of acid **7** (59 mg, 0.4 mmol) in anhydrous acetonitrile (2 mL) at room temperature under argon was added HATU (143 mg, 0.4 mmol) and DIPEA (273 μL, 1.6 mmol). The resulting mixture was then transferred via cannula to a stirred solution of crude **6** in acetonitrile (2 mL) at room temperature and rinsed with additional acetonitrile (1 mL). After

stirring for 24 h, the reaction was quenched by addition of saturated aqueous NH<sub>4</sub>Cl (3 mL) and then diluted with ethyl acetate (15 mL). The aqueous phase was extracted with ethyl acetate (3 × 10 mL). The combined organic extracts were dried over MgSO<sub>4</sub>, filtered, and concentrated. The residue was purified via silica gel chromatography (5:1 to 3:1 hexane/ ethyl acetate) to afford **4** (57 mg, 52%, 2 steps) and its C-14 epimer (9 mg) as colorless oil. Compound **4**: [ $\alpha$ ]<sub>D</sub><sup>20</sup> -58.6 (c 1.05, CH<sub>2</sub>Cl<sub>2</sub>); <sup>1</sup>H NMR (400 MHz, CDCl<sub>3</sub>)  $\delta$  6.36 (dd, *J* = 17.6, 10.8 Hz, 1H), 6.26 (dt, *J* = 13.6, 6.8 Hz, 1H), 6.00 (d, *J* = 8.8 Hz, 1H), 5.89 (dd, *J* = 11.6, 8.0 Hz, 1H), 5.70 (d, *J* = 11.6 Hz, 1H), 5.46 (t, *J* = 6.8 Hz, 1H), 5.10 (d, *J* = 17.6 Hz, 1H), 4.95 (d, *J* = 10.8 Hz, 1H), 3.94 (t, *J* = 3.2 Hz, 1H), 3.67 (dd, *J* = 6.4, 2.0 Hz, 1H), 3.54 (dt, *J* = 7.6, 2.8 Hz, 1H), 2.45-2.32 (m, 1H), 2.30-2.17 (m, 1H), 2.04 (s, 3H), 2.00-1.86 (m, 2H), 1.84-1.75 (m, 1H), 1.75 (s, 3H), 1.39 (d, *J* = 6.4 Hz, 3H), 1.15 (d, *J* = 6.4 Hz, 3H), 1.02 (d, *J* = 7.2 Hz, 3H); <sup>13</sup>C NMR (100 MHz, CDCl<sub>3</sub>)  $\delta$  170.4, 164.8, 143.6, 141.3, 135.7, 128.1, 122.5, 111.1, 80.8, 76.0, 68.9, 47.1, 35.8, 31.9, 28.9, 21.2, 20.0, 17.8, 15.0, 11.9; IR (neat) 3358, 2977, 2934, 1739, 1668, 1634, 1520, 1369, 1243, 1049, 1011 cm<sup>-1</sup>; HRMS (ESI), *m/z* (M+Na)<sup>+</sup> Calcd for C<sub>20</sub>H<sub>31</sub>NO<sub>4</sub>Na: 372.2151, found 372.2152.

*Synthesis of spliceostatin A (2):*

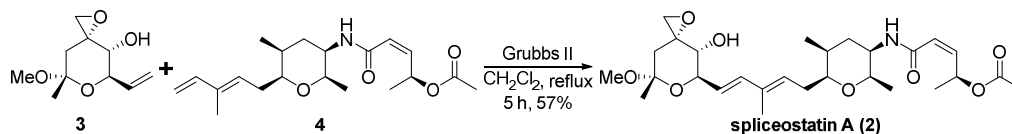

To a solution of **4** (45 mg, 0.13 mmol) in anhydrous dichloromethane (1 mL) at room temperature under argon was added a solution of **3** (31 mg, 0.16 mmol) in anhydrous dichloromethane (500  $\mu$ L) and Grubbs' 2nd generation catalyst (11 mg, 0.01 mmol). The resulting mixture was heated to reflux for 5 h and then concentrated. The residue was purified via silica gel chromatography (2:1 to 1:2 hexane/ ethyl acetate) to afford spliceostatin A (**2**) (29 mg) as a white powder, in addition to recovered of **3** and **4**.

The combined recovery of **3** and **4** was dissolved in anhydrous dichloromethane (1 mL) at room temperature under argon, to which Grubbs' 2nd generation catalyst (5 mg) was added. The resulting mixture was heated to reflux for 5 h and then concentrated. The residue was purified via silica gel chromatography (2:1 to 1:2 hexane/ ethyl acetate) to afford spliceostatin A (**2**) (9 mg) as a white powder. The combined yield of spliceostatin A (**2**) after one cycle is 38 mg (57%).

Spliceostatin A (**2**): mp 64-68 °C;  $[\alpha]_D^{20} +25.3$  (*c* 1.07, CHCl<sub>3</sub>); <sup>1</sup>H NMR (400 MHz, CDCl<sub>3</sub>) δ 6.40 (d, *J* = 15.6 Hz, 1H), 6.26 (dt, *J* = 13.6, 6.8 Hz, 1H), 6.01 (d, *J* = 9.2 Hz, 1H), 5.89 (dd, *J* = 11.2, 8.0 Hz, 1H), 5.75-5.65 (m, 2H), 5.51 (t, *J* = 6.8 Hz, 1H), 4.05 (dd, *J* = 9.2, 7.2 Hz, 1H), 3.94 (d, *J* = 7.6 Hz, 1H), 3.66 (dd, *J* = 14.2, 6.0 Hz, 1H), 3.60 (t, *J* = 10.2 Hz, 1H), 3.52 (dt, *J* = 6.8, 2.0 Hz, 1H), 3.28 (s, 3H), 2.99 (d, *J* = 4.8 Hz, 1H), 2.50 (d, *J* = 4.4 Hz, 1H), 2.42-2.19 (m, 3H), 2.04 (s, 3H), 1.99-1.85 (m, 2H), 1.79 (s, 3H), 1.78-1.68 (m, 3H), 1.39 (d, *J* = 6.0 Hz, 3H), 1.38 (s, 3H), 1.15 (d, *J* = 6.4 Hz, 3H), 1.02 (d, *J* = 7.2 Hz, 3H); <sup>13</sup>C NMR (100 MHz, CDCl<sub>3</sub>) δ 170.3, 164.8, 143.6, 138.1, 134.7, 128.9, 124.1, 122.5, 98.6, 80.8, 75.9, 73.2, 68.9, 67.6, 56.5, 48.4, 47.1, 42.0, 35.8, 32.0, 28.9, 23.0, 21.2, 19.9, 17.8, 15.0, 12.6; IR (KBr) 3450, 2977, 1739, 1669, 1635, 1522, 1368, 1245, 1049, 1010 cm<sup>-1</sup>; HRMS (ESI), *m/z* (M+Na)<sup>+</sup> Calcd for C<sub>28</sub>H<sub>43</sub>NO<sub>8</sub>Na: 544.2887, found 544.2886.

Synthesis of FR901464 (**1**):

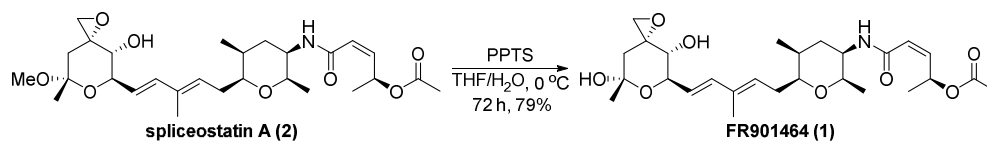

To a solution of spliceostatin A (**2**) (6.2 mg, 0.01 mmol) in THF/H<sub>2</sub>O (3 mL/ 0.75 mL) at 0 °C under argon was added PPTS (17.9 mg, 0.07 mmol). The resulting solution was stirred for 72 h and was then diluted with ethyl acetate (5 mL). The aqueous phase was extracted with ethyl acetate (3 × 3 mL). The combined organic extracts were dried over MgSO<sub>4</sub>, filtered, and concentrated. The residue was purified via silica gel chromatography (1:1 to 1:4 hexane/ ethyl acetate) to afford FR901464 (**1**) (4.8 mg, 79%) as a white powder: mp 64-67 °C;  $[\alpha]_D^{23} -13.0$  (*c* 0.45, CH<sub>2</sub>Cl<sub>2</sub>); <sup>1</sup>H NMR (500 MHz, CD<sub>2</sub>Cl<sub>2</sub>) δ 6.38 (d, *J* = 15.5 Hz, 1H), 6.26 (m, 1H), 5.98 (d, *J* = 9.0 Hz, 1H), 5.90 (dd, *J* = 11.5, 8.0 Hz, 1H), 5.71 (dd, *J* = 11.5, 1.0 Hz, 1H), 5.65 (dd, *J* = 15.7, 7.0 Hz, 1H), 5.54 (t, *J* = 7.0 Hz, 1H), 4.24 (dd, *J* = 9.3, 7.0 Hz, 1H), 3.93-3.87 (m, 1H), 3.66 (qd, *J* = 6.5, 2.1 Hz, 1H), 3.57 (t, *J* = 10.0 Hz, 1H), 3.57-3.50 (m, 1H), 3.34 (s, 1H), 3.06 (d, *J* = 4.5 Hz, 1H), 2.55 (d, *J* = 4.5 Hz, 1H), 2.40-2.31 (m, 1H), 2.34 (d, *J* = 14.3 Hz, 1H), 2.28-2.20 (m, 1H), 2.01 (s, 3H), 1.95-1.91 (m, 2H), 1.78 (s, 3H), 1.78-1.76 (m, 1H), 1.64 (d, *J* = 14.5 Hz, 1H), 1.62 (d, *J* = 10.3 Hz, 1H), 1.43 (s, 3H), 1.34 (d, *J* = 6.5 Hz, 3H), 1.11 (d, *J* = 6.5 Hz, 3H), 1.01 (d, *J* = 7.3 Hz, 3H); <sup>13</sup>C NMR (150 MHz, CD<sub>2</sub>Cl<sub>2</sub>) δ 170.6, 164.9, 143.9, 138.3, 134.8, 129.9, 124.6, 122.8,

96.7, 81.1, 76.2, 73.8, 68.9, 68.1, 58.1, 48.1, 47.3, 41.8, 36.2, 32.3, 29.5, 29.1, 21.4, 20.1, 17.9, 15.2, 12.7; IR (KBr) 3449, 2976, 1738, 1667, 1636, 1524, 1369, 1244, 1049, 1010  $\text{cm}^{-1}$ ; HRMS (ESI),  $m/z$  ( $M+\text{Na}$ )<sup>+</sup> Calcd for  $\text{C}_{27}\text{H}_{41}\text{NO}_8\text{Na}$ : 530.2730, found 530.2729.

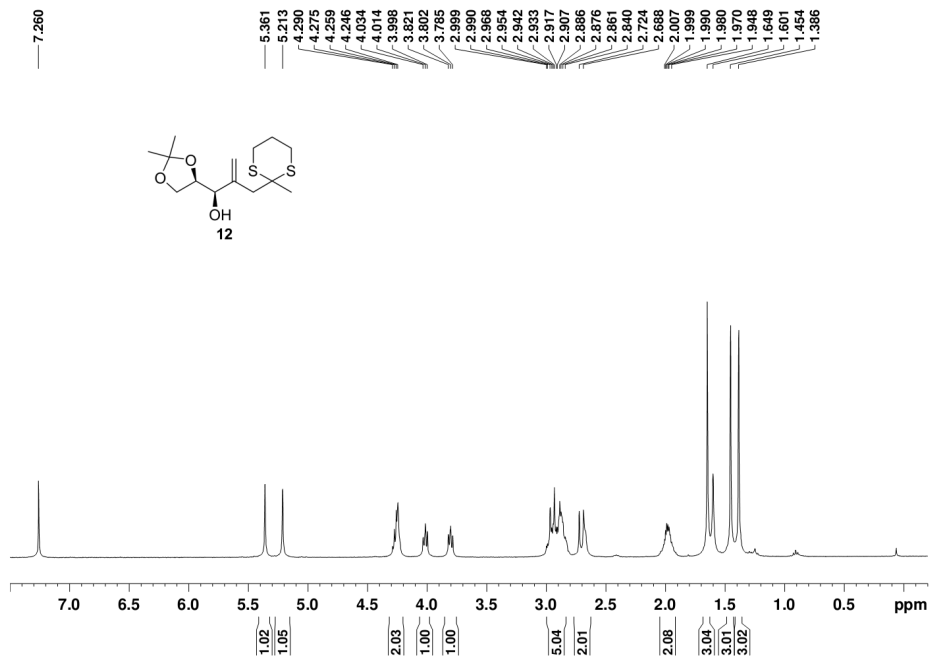

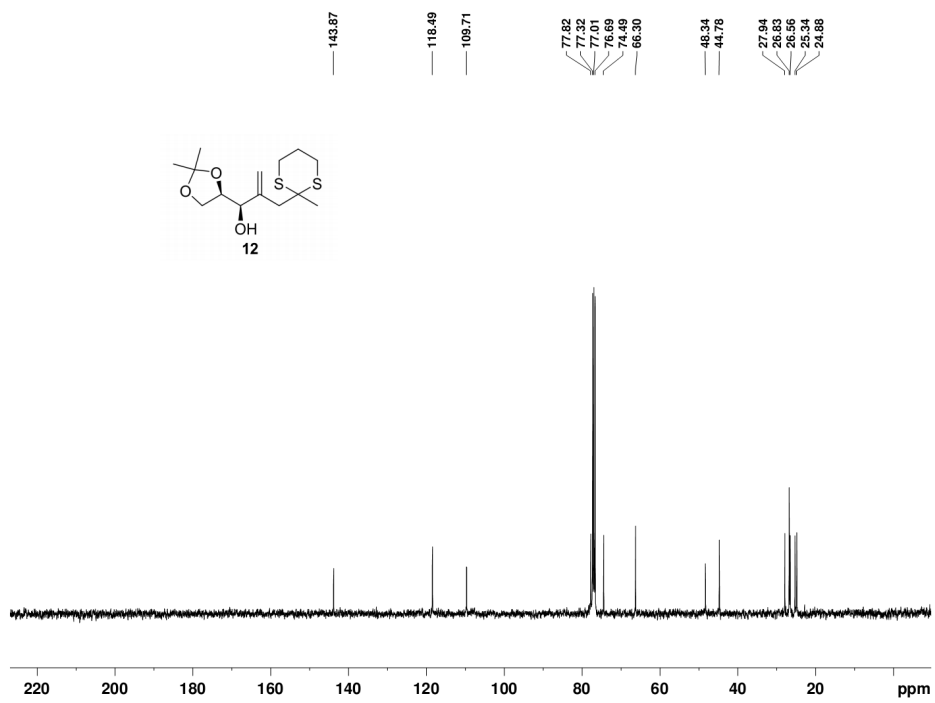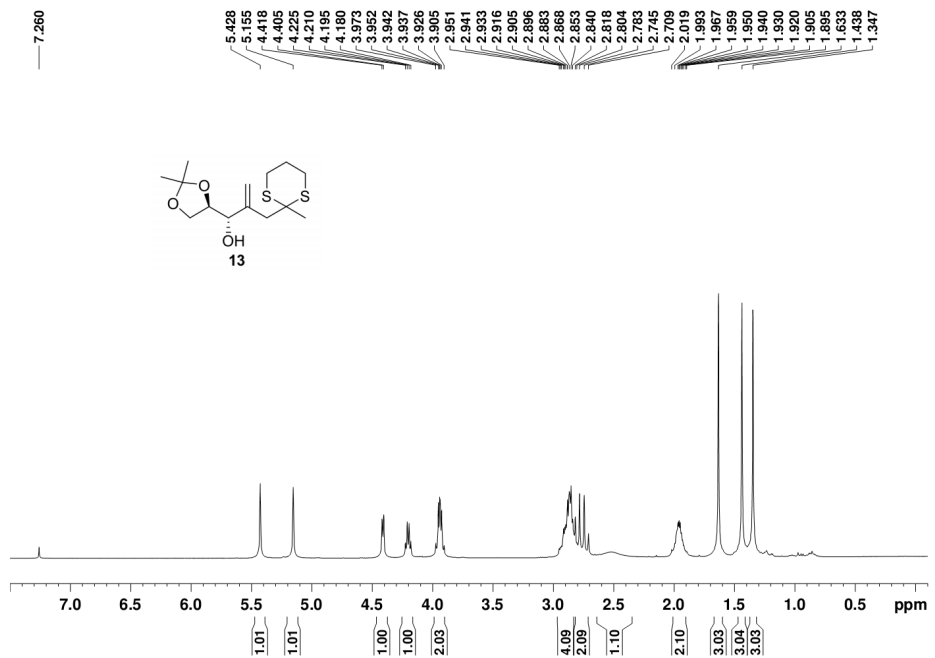

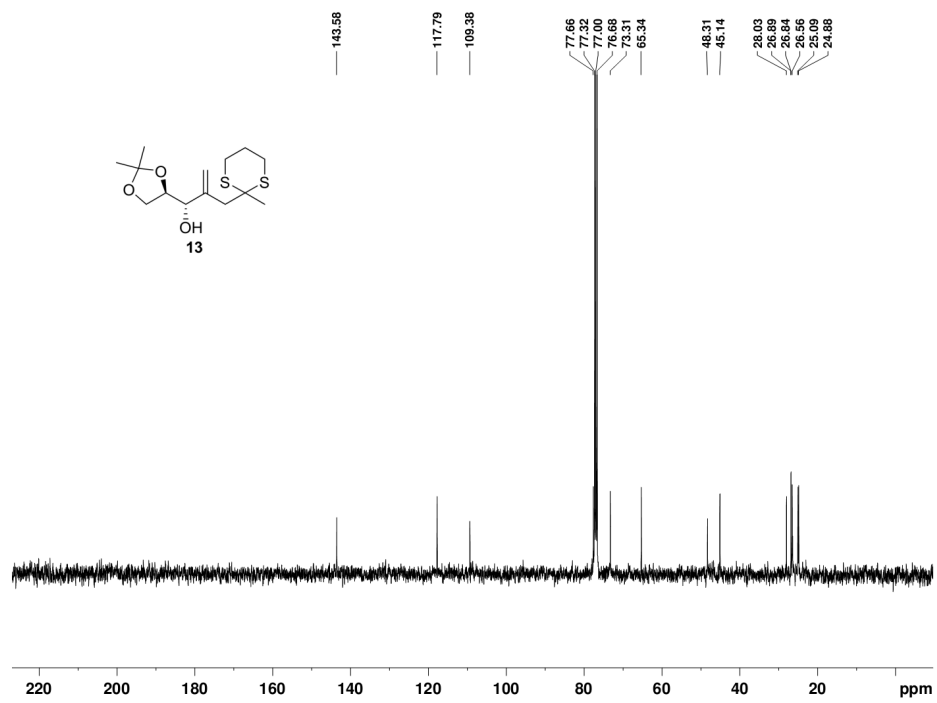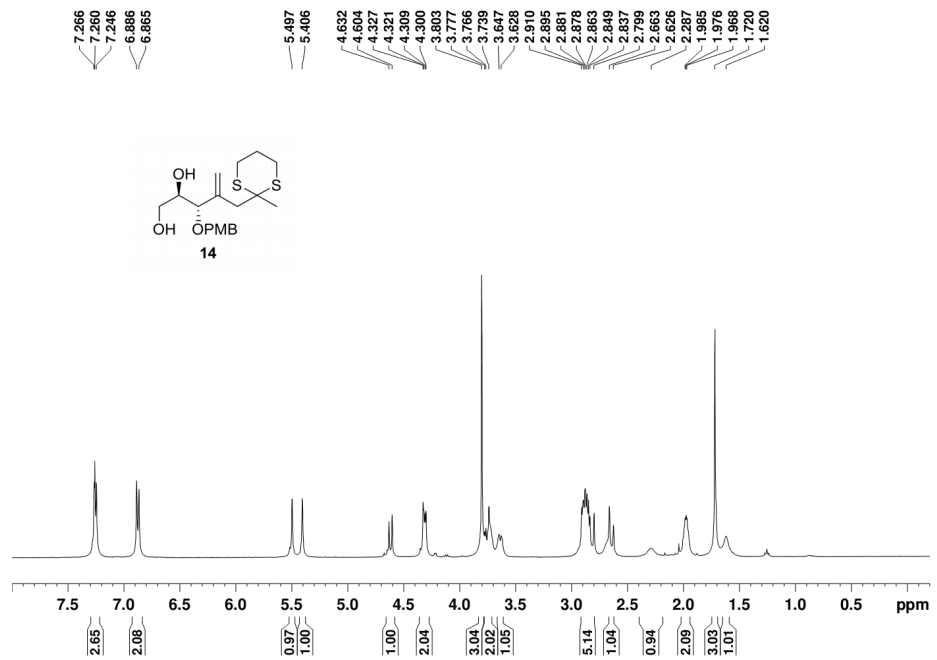



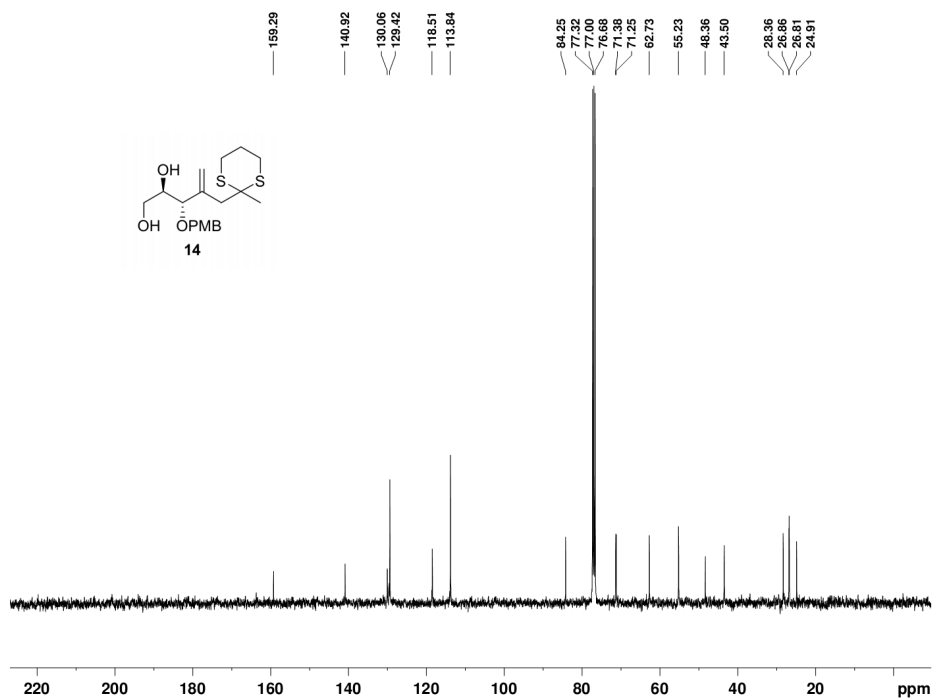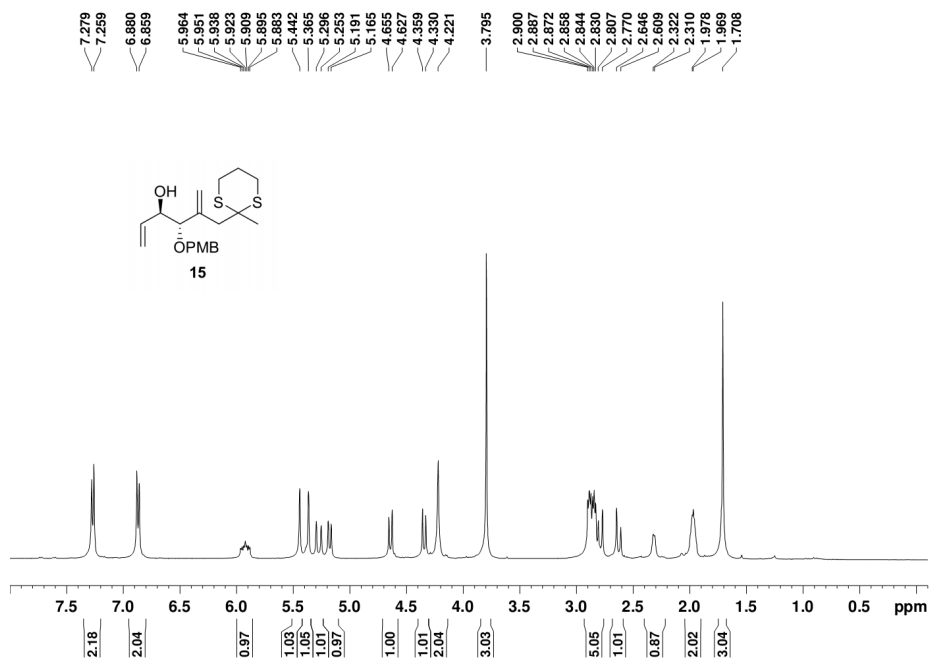

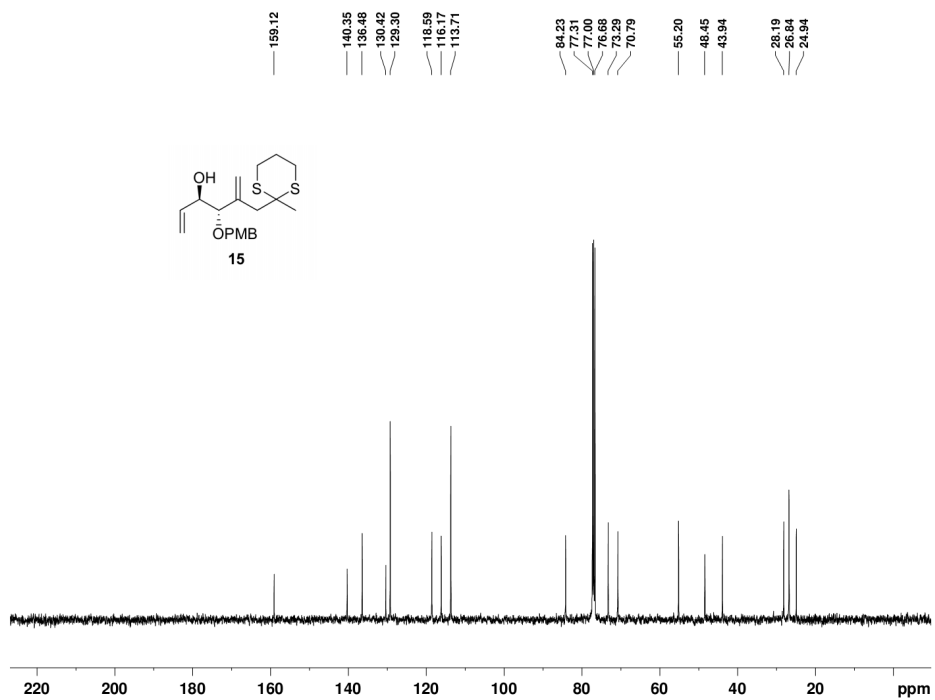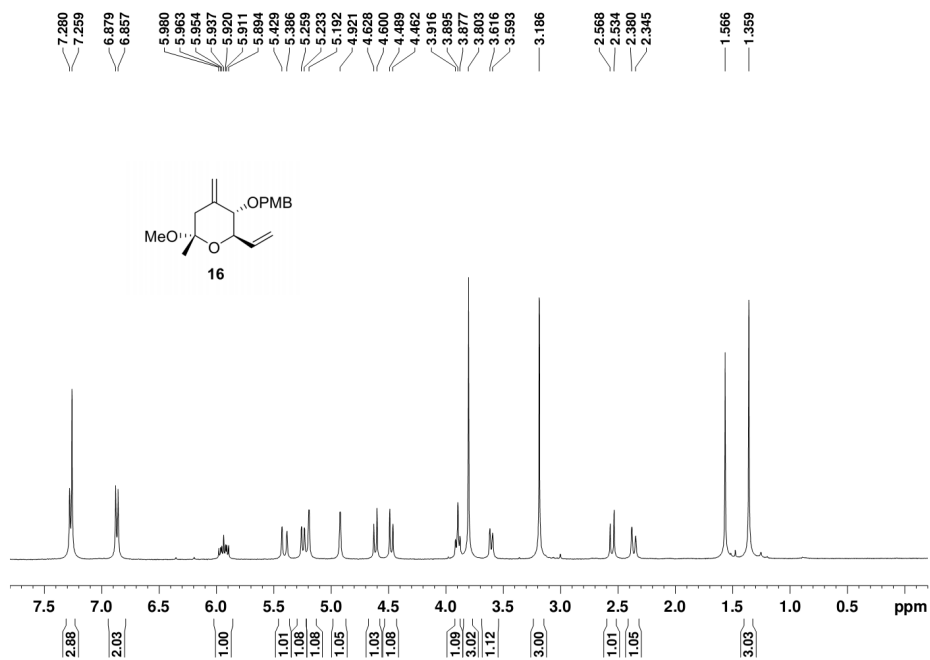

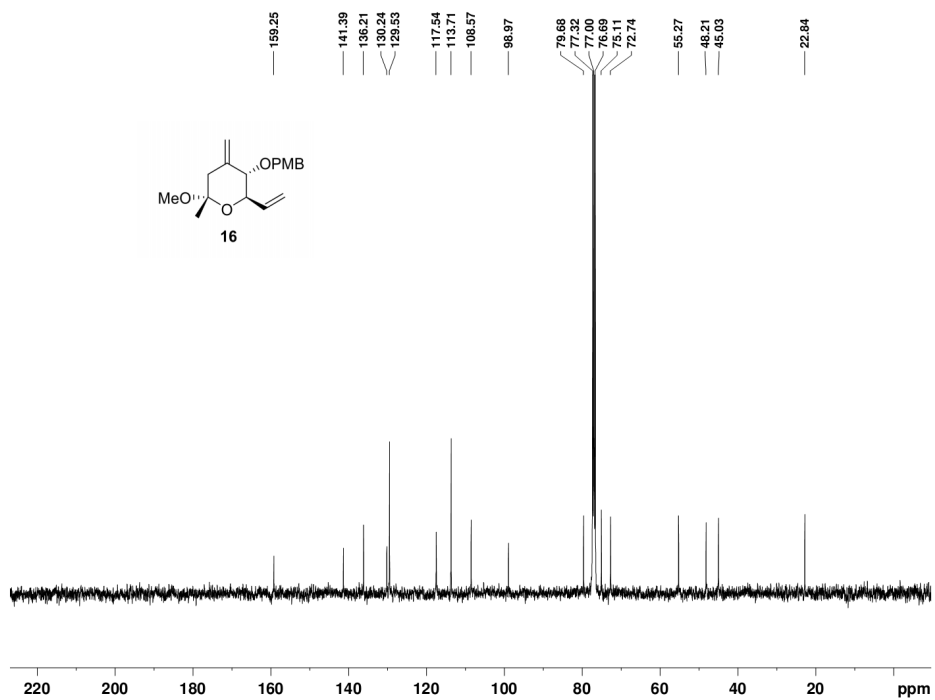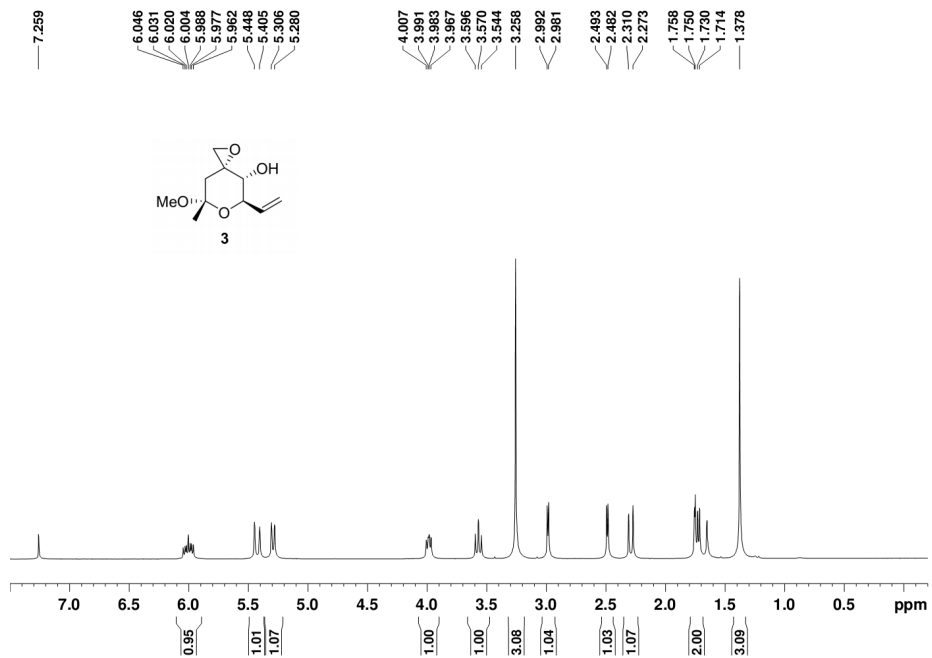

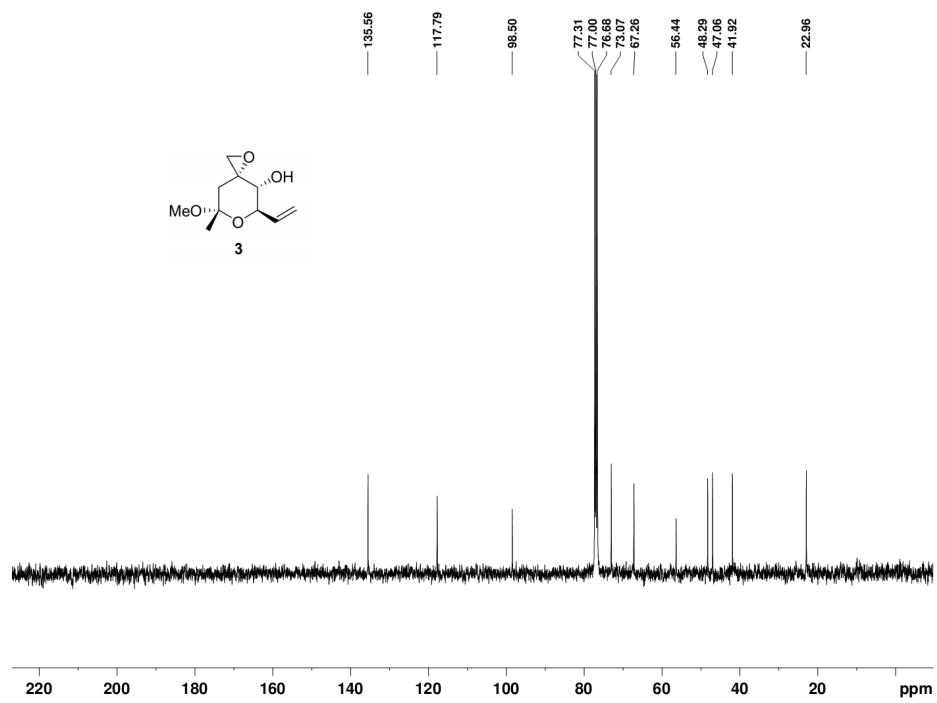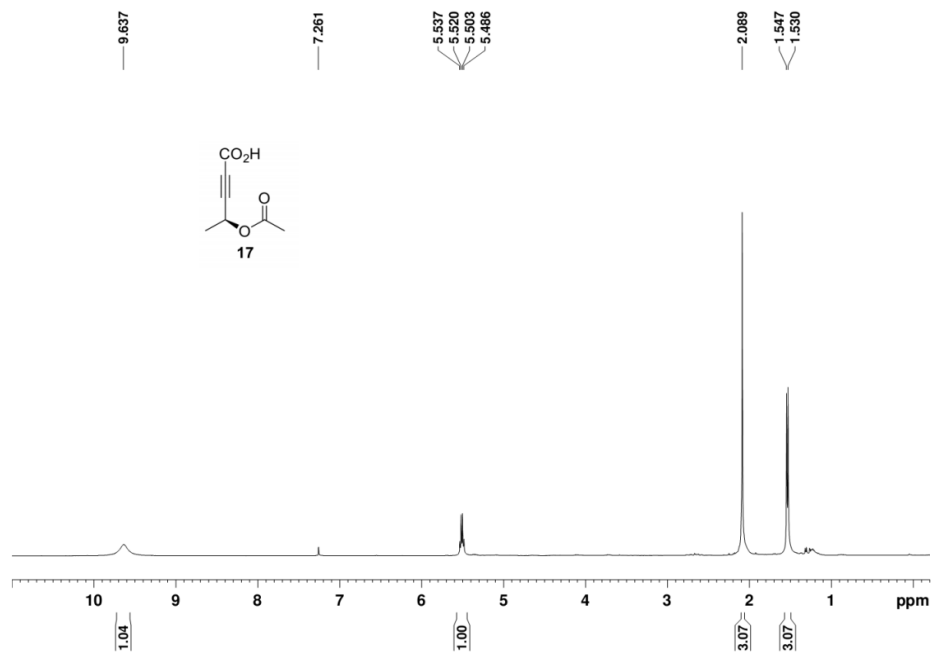

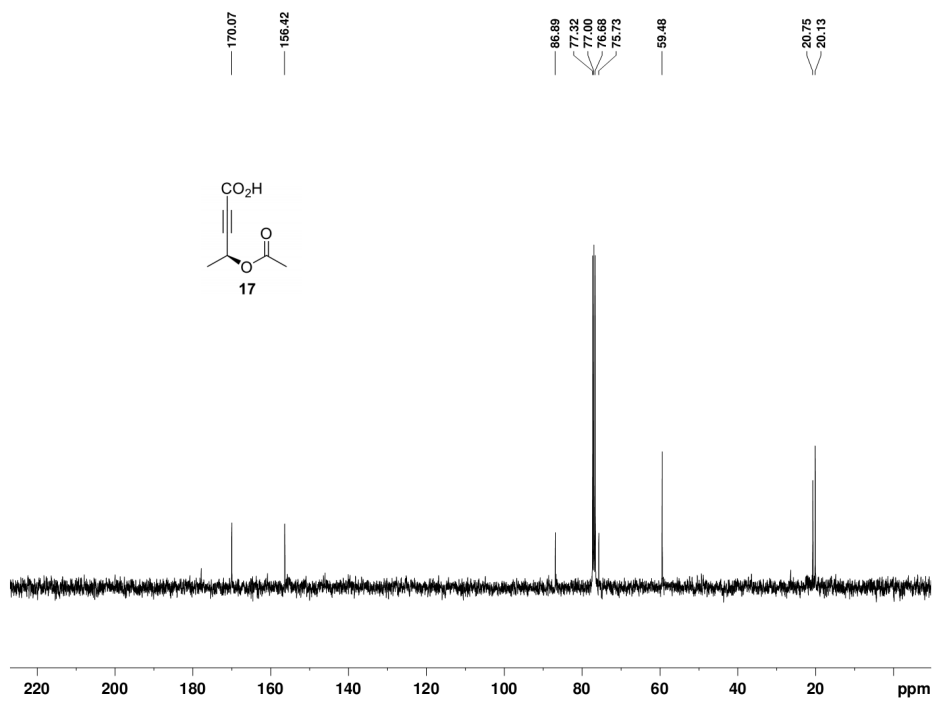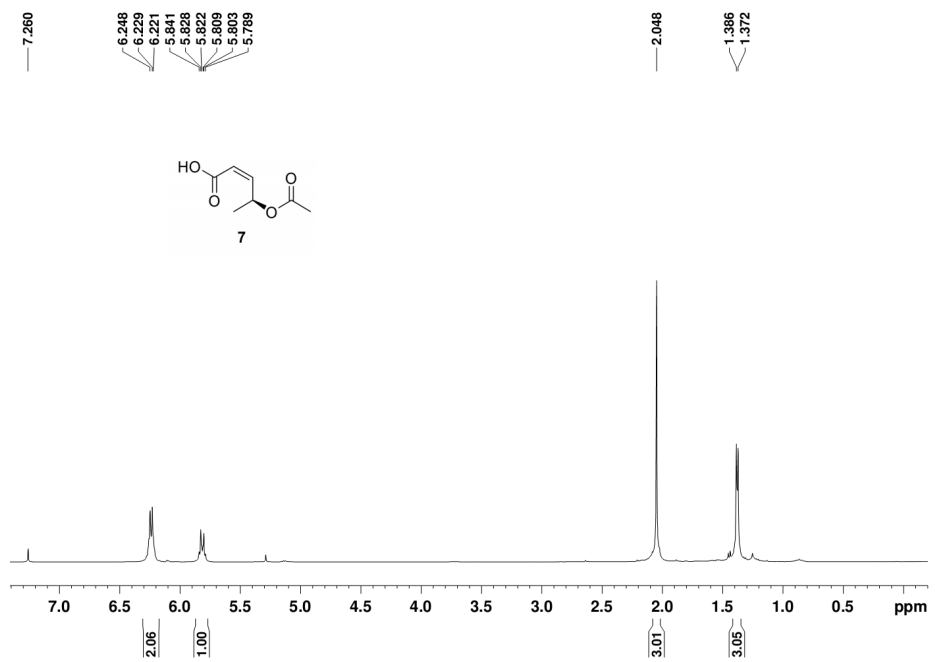

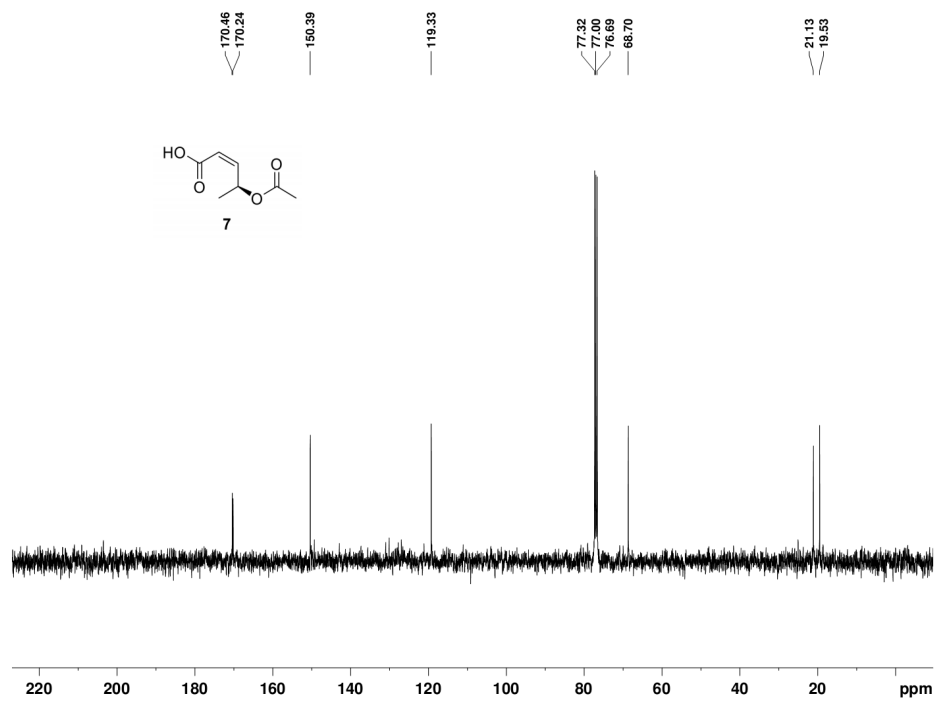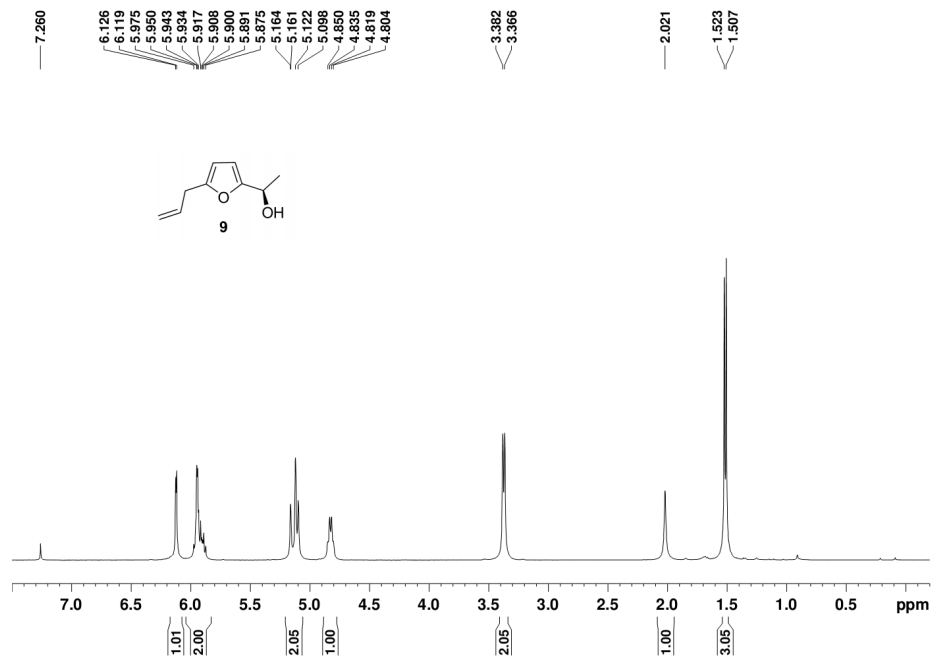

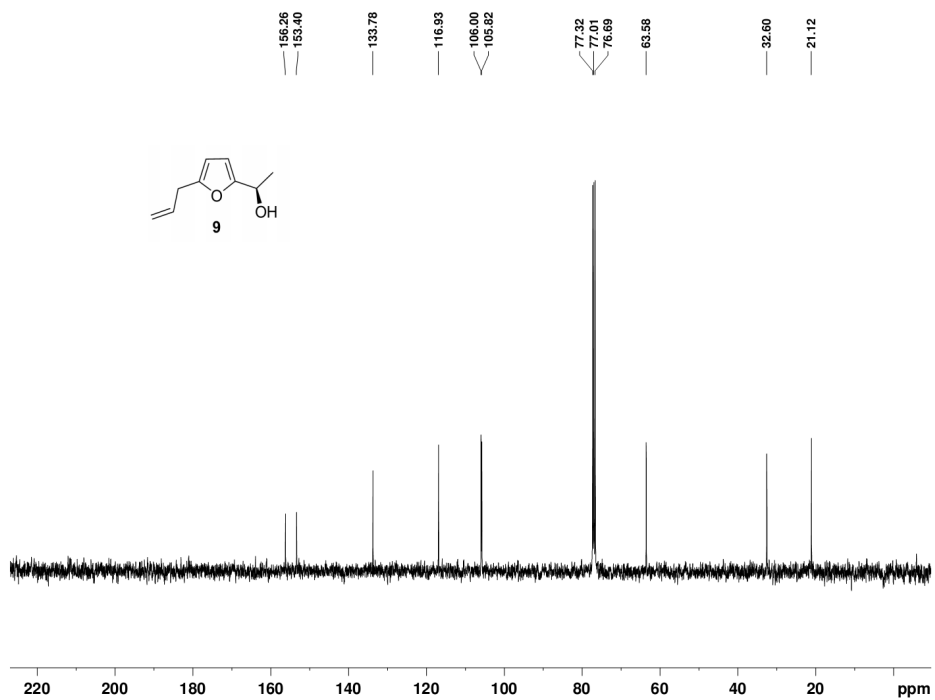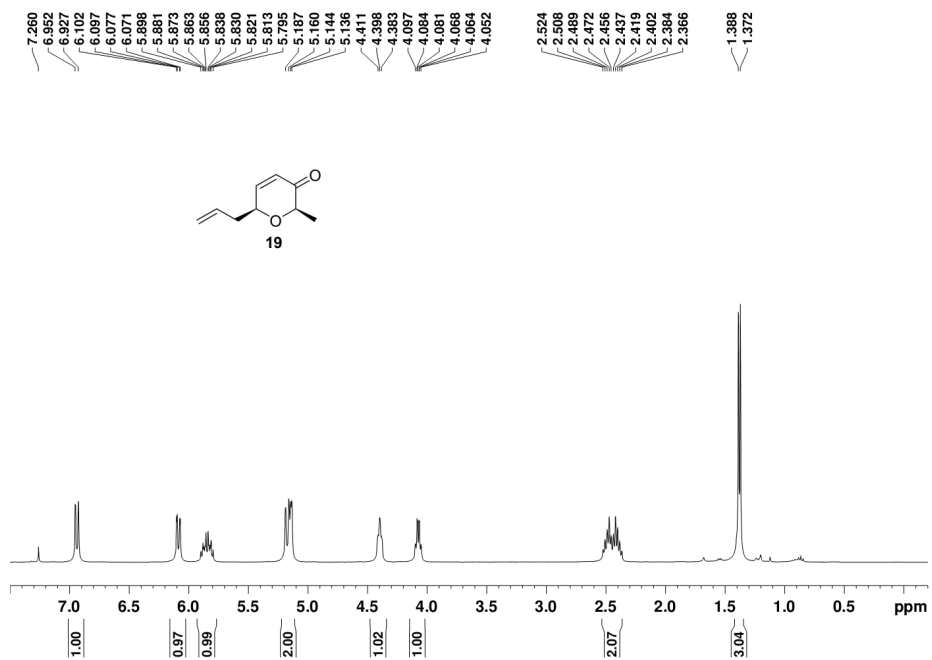

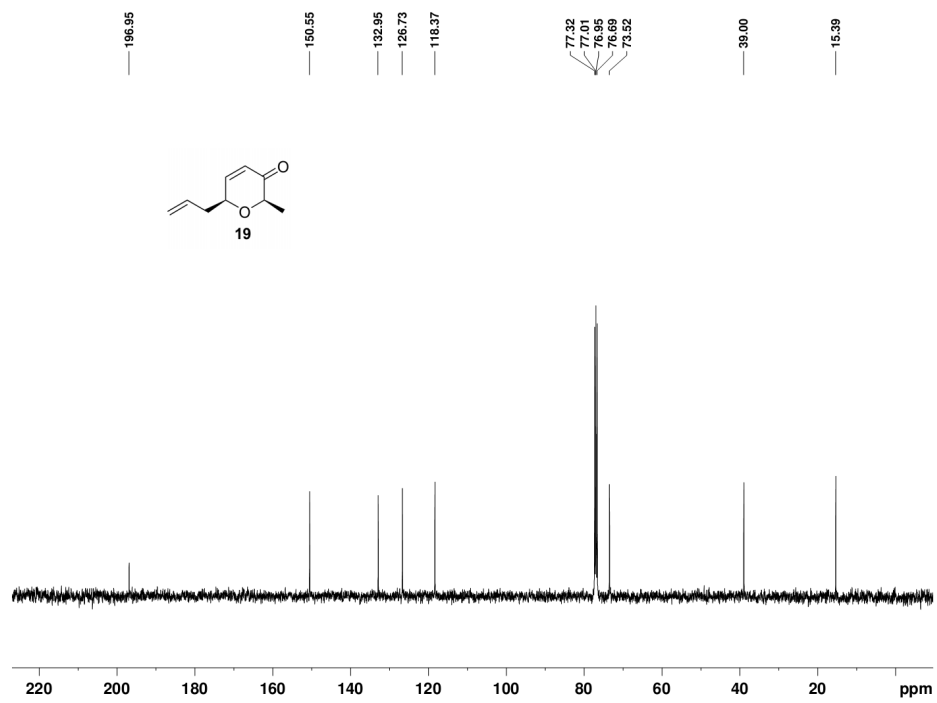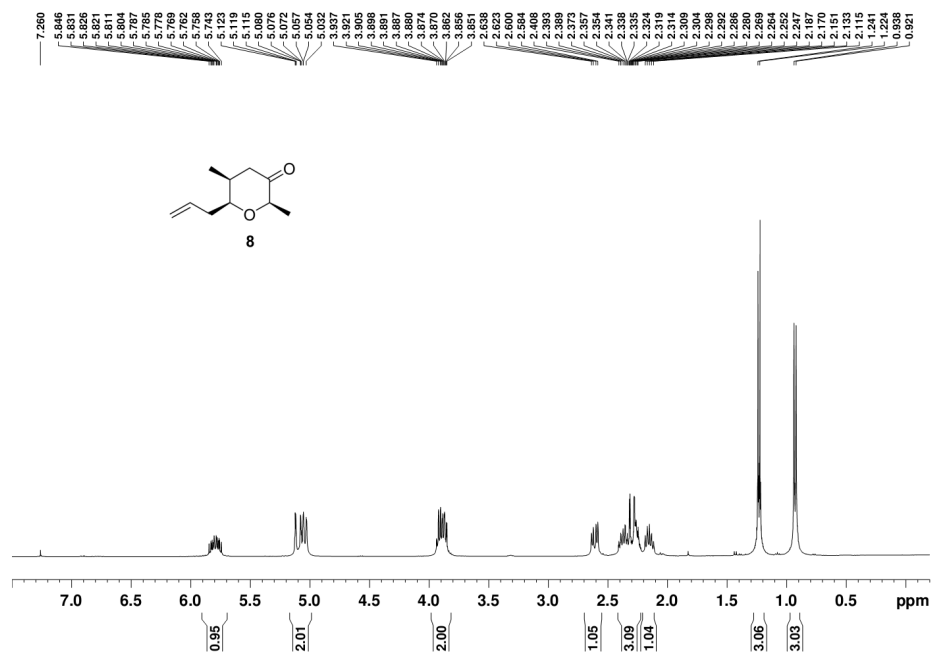



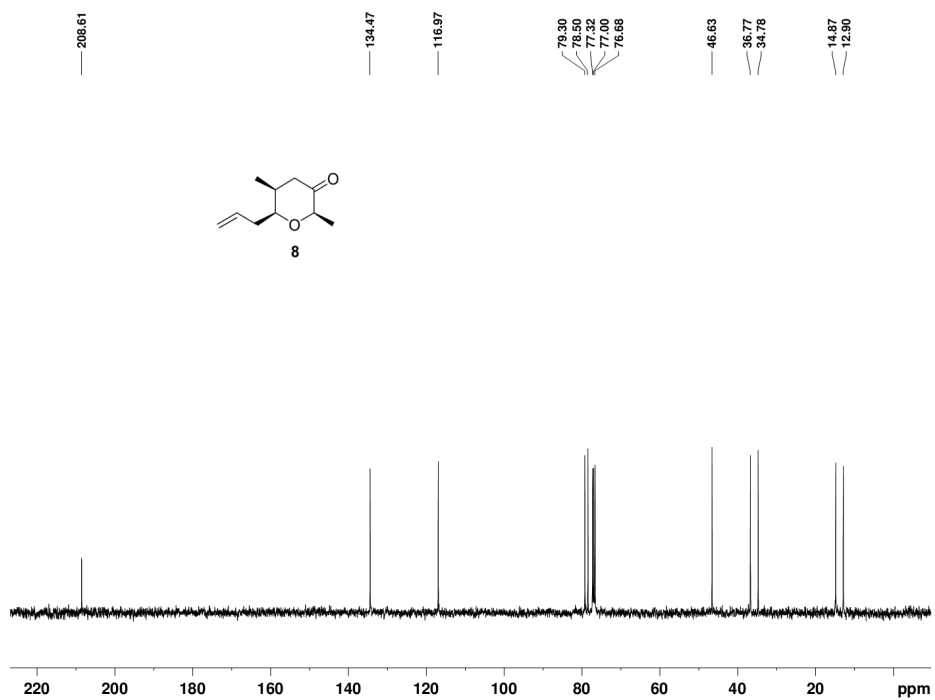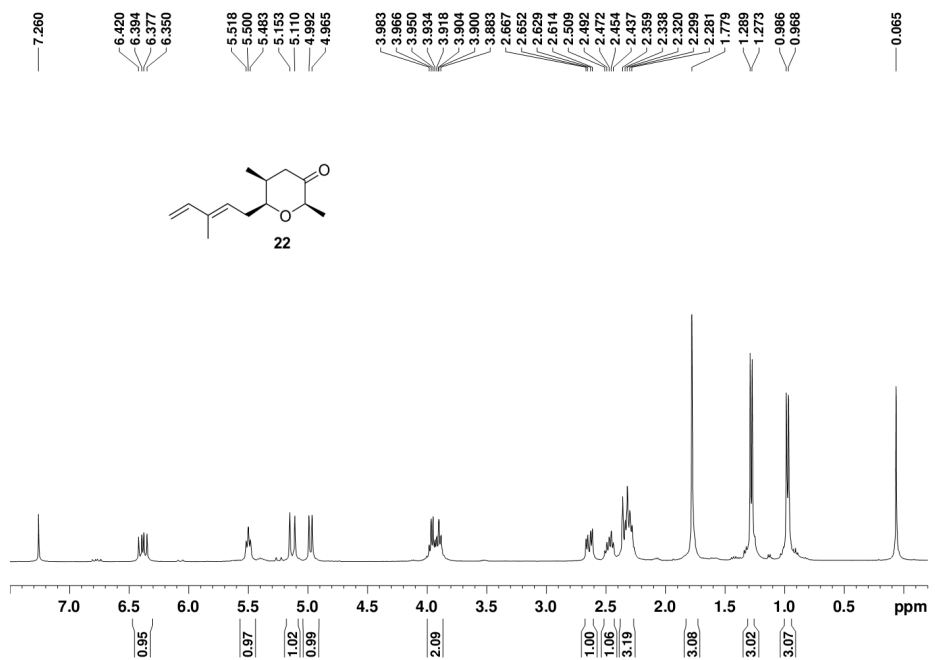

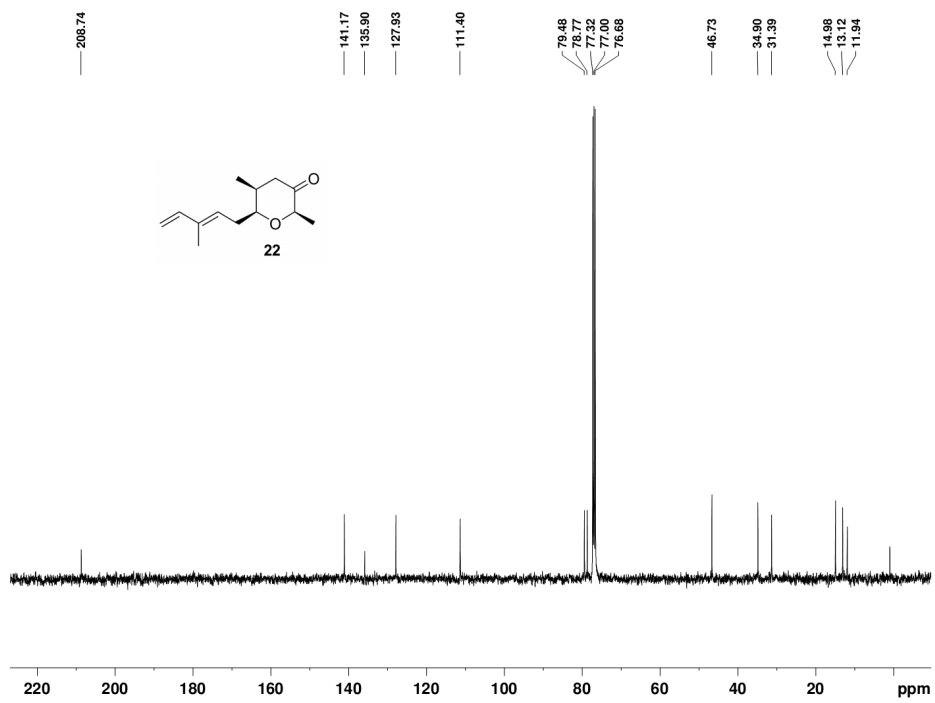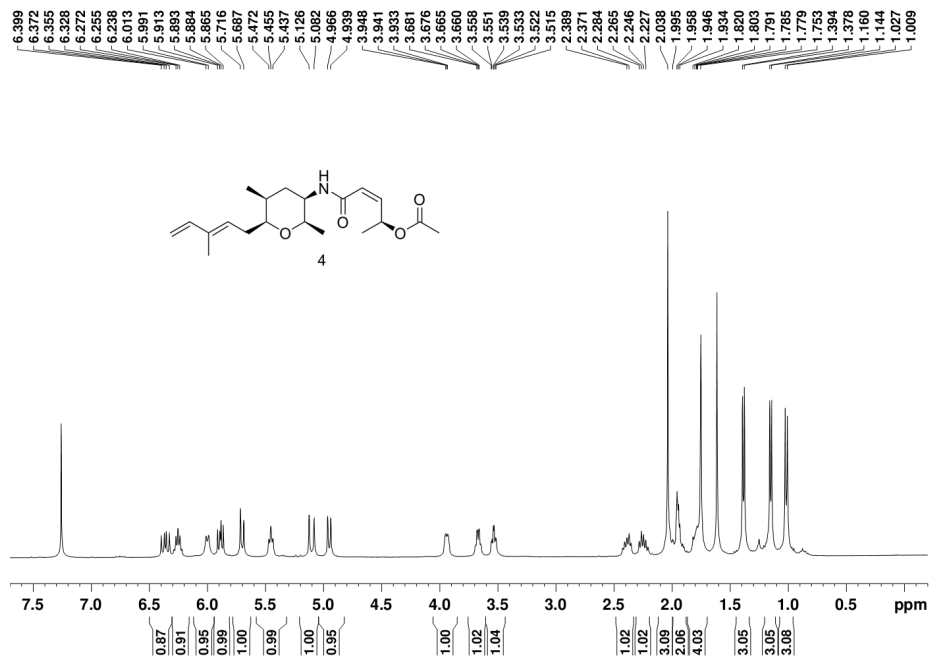

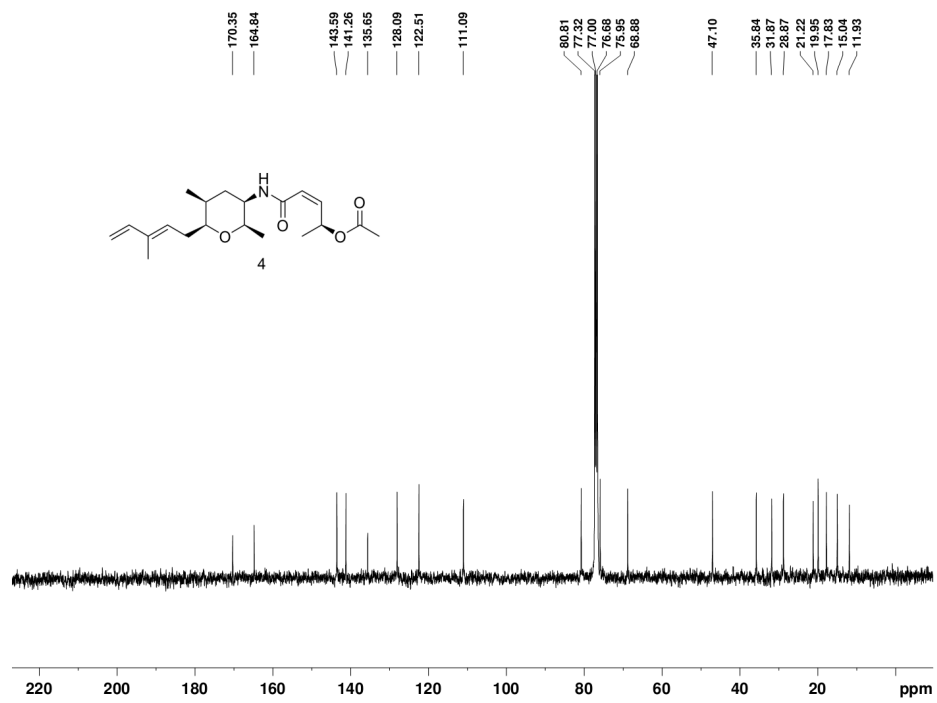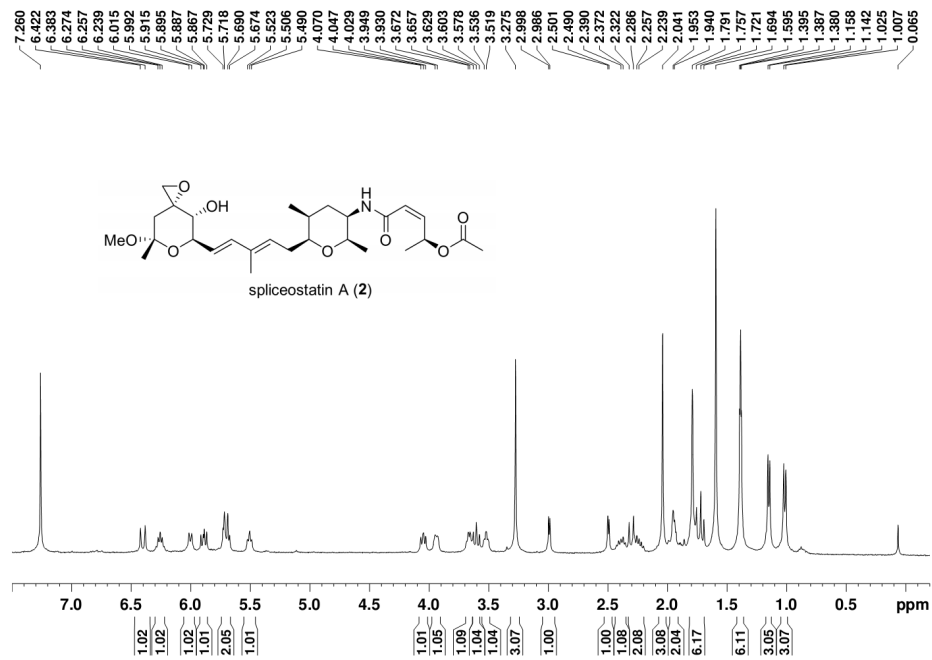

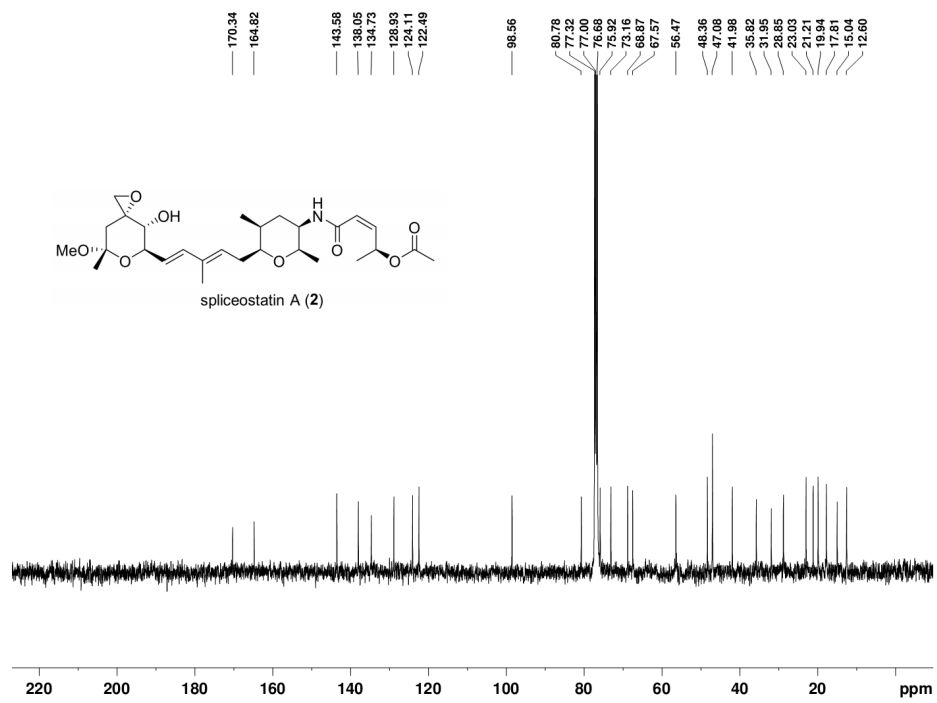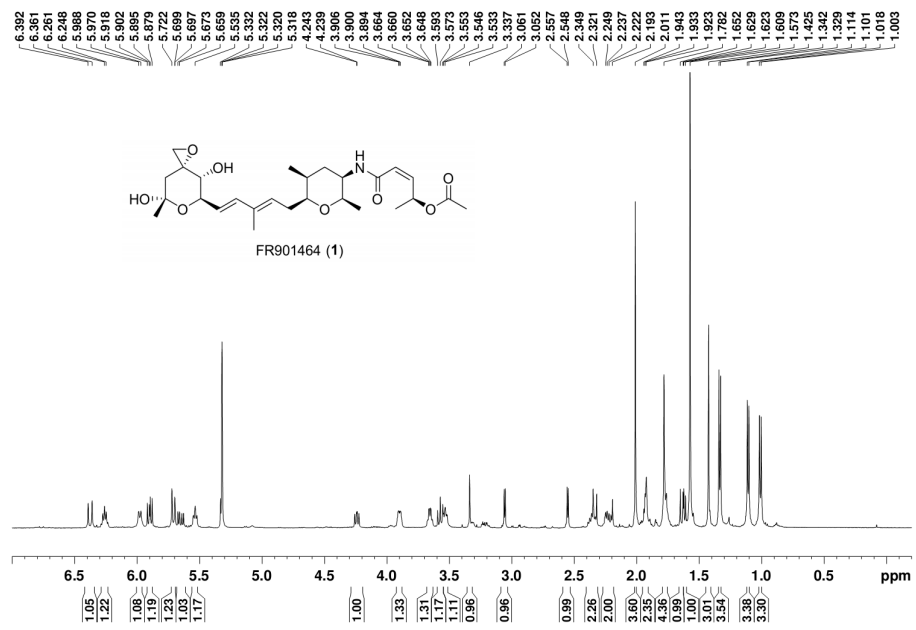

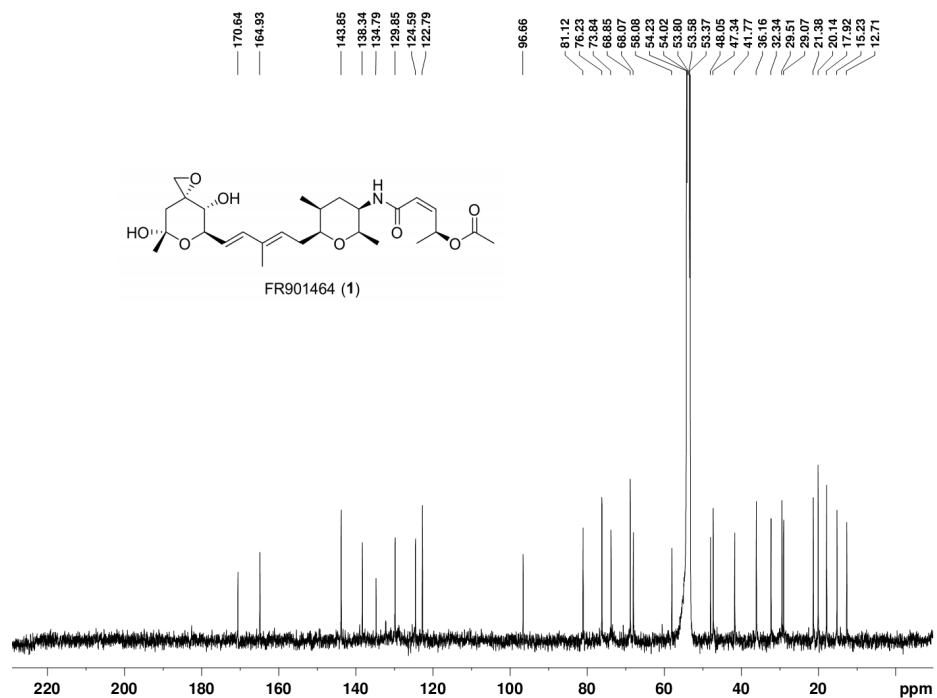

<sup>1</sup>H NMR of Fujisawa's FR901464 (*J. Antibiot.* **1997**, 50, 96)

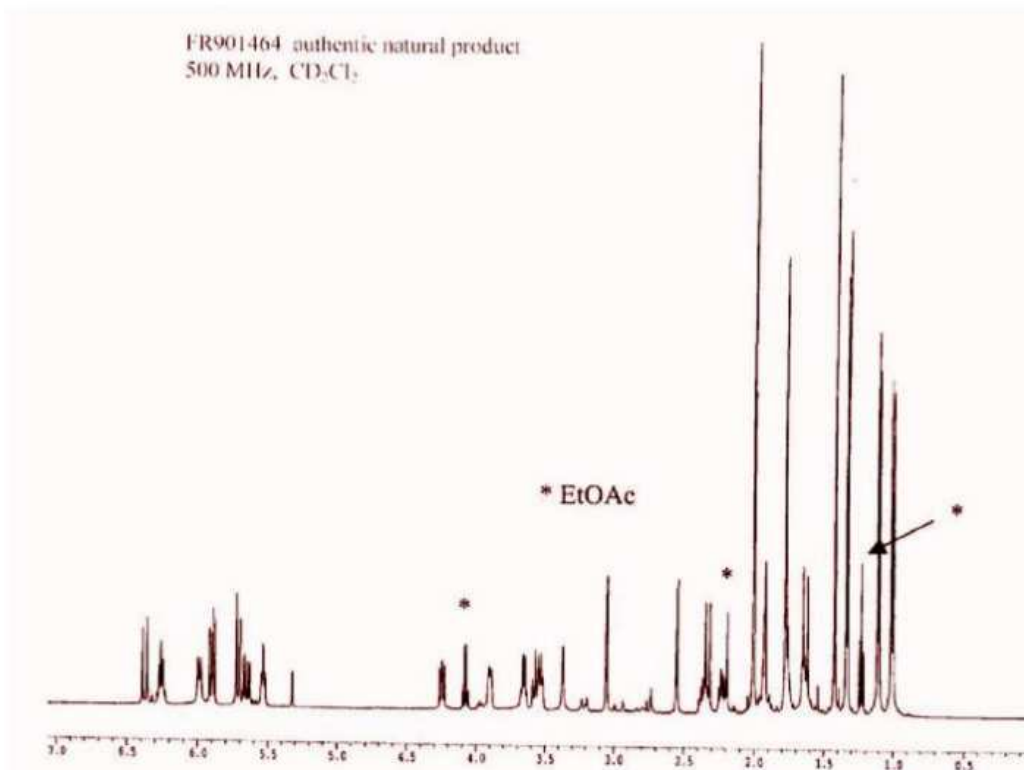

<sup>13</sup>C NMR

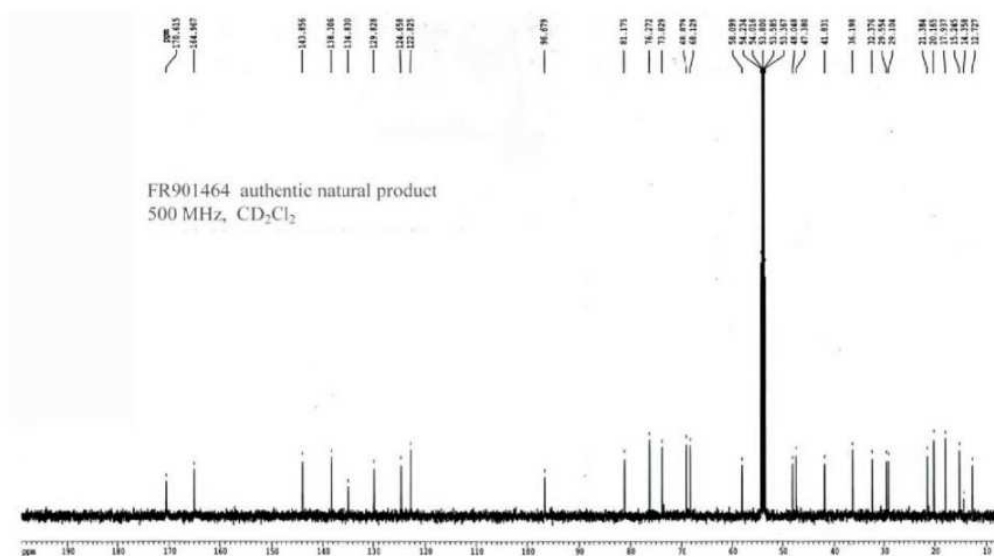

<sup>1</sup>H NMR of Koide's synthetic FR901464 (*J. Am. Chem. Soc.* **2006**, *128*, 2792-2793.)

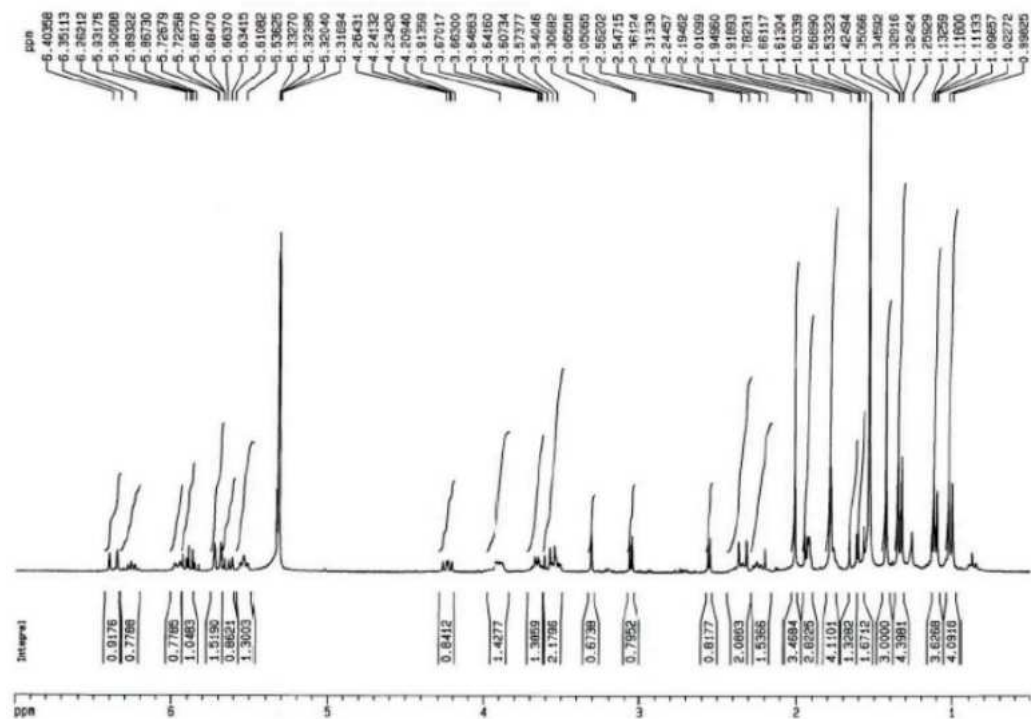

$^{13}\text{C}$  NMR of Koide's synthetic FR901464 (*J. Am. Chem. Soc.* **2006**, *128*, 2792-2793.)

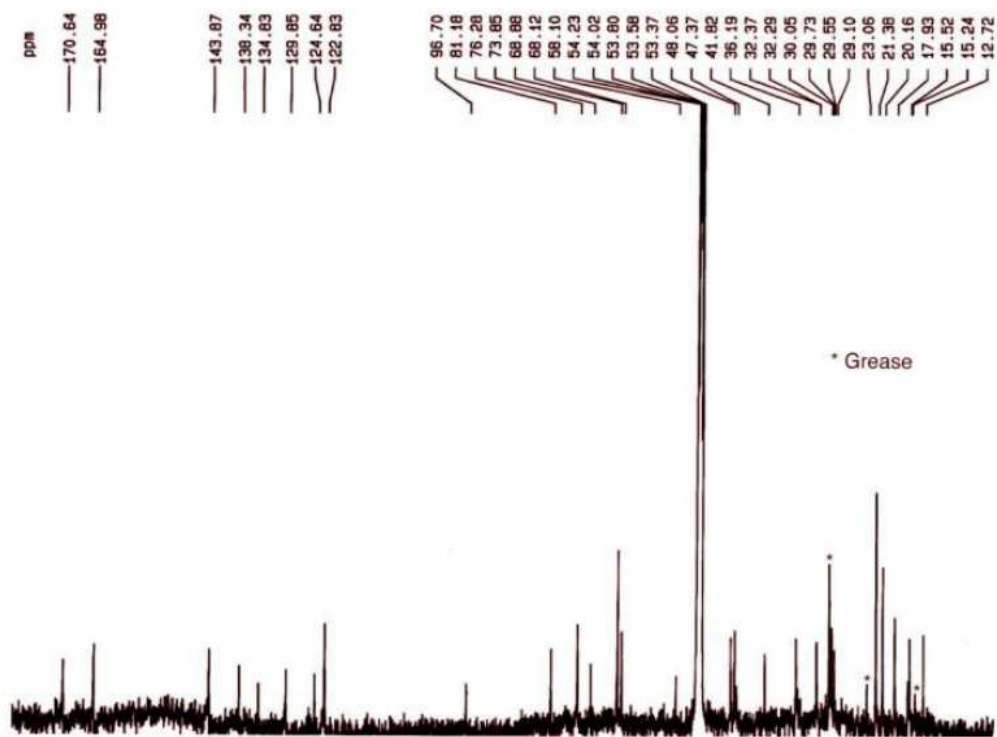

Supplement: NIHMS526315-supplement-1_si_001.pdf [file NIHMS526315-supplement-1_si_001.pdf]
